# Supplementary material for: Virtual strike and dip – Advancing inclusive and accessible field geology
Source: Copernicus journal article supplement (doi:10.5194/gc-2021-16), 2021-06-28
Supplement: Supplementary file [file gc-2021-16-RC1-supplement.pdf]

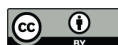

1   **Virtual strike and dip - Advancing inclusive and accessible field geology**

2

3   *Natalie Bursztyn<sup>1</sup>, Pejman Sajjadi<sup>2,3</sup>, Hannah Riegel<sup>4</sup>, Jiawei Huang<sup>2,3</sup>, Jan Oliver Wallgrün<sup>3</sup>,*  
4   *Jiayan Zhao<sup>2,3</sup>, Bart Masters<sup>3</sup>, Alexander Klippel<sup>2,3</sup>*

5

6   <sup>1</sup>*Department of Geosciences, University of Montana, Charles H Clapp Building 126, Missoula,*  
7   <sup>MT 59812, USA</sup>

8

9   <sup>2</sup>*Department of Geography, The Pennsylvania State University, Walker Building, 302 N Burrowes*  
10   <sup>Street, University Park, PA 16802, USA</sup>

11

12   <sup>3</sup>*Center for Immersive Experiences, The Pennsylvania State University*  
13   <sup>University Park, PA 16802, USA</sup>

14

15   <sup>4</sup>*Department of Geological and Environmental Sciences, Appalachian State University, 033*  
16   <sup>Rankin Science West, Boone, NC 28608, USA</sup>

17

18

19

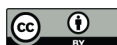

## 20 **ABSTRACT**

21 Accessibility and inclusivity in field geology have become increasingly important issues to address  
22 in geoscience education and have long been set aside due to the tradition of field geology and the  
23 laborious task of making it inclusive to all. Although a popular saying among geologists is “the  
24 best geologists see the most rocks”, field trips cost money, time, and are only accessible for those  
25 who are physically able to stay outside long hours. With the availability of 3D block diagrams, an  
26 onslaught of virtual learning environments is becoming increasingly viable. Strike and dip is at the  
27 core of any field geologist’s education and career; learning and practicing these skills is  
28 fundamental to making geologic maps and understanding the regional geology of an area.  
29 In this paper, we present the Strike and Dip virtual tool (SaD) with the objective of teaching the  
30 principles of strike and dip for geologic mapping to introductory geology students.  
31 We embedded the SaD tool into an introductory geology course and recruited 147 students to  
32 participate in the study. Participants completed two maps using the SaD tool and reported on their  
33 experiences through a questionnaire. The SaD tool was overall perceived positively by students.  
34 Furthermore, some individual differences among students proved to be important contributing  
35 factors to their experiences and subjective assessments of learning. When controlling for  
36 participants’ past experience with similar software, our results indicate that students highly  
37 familiar with navigating geographical software perceived the virtual environment of the tool to be  
38 significantly more realistic and easier to use compared to those with lower levels of familiarity.  
39 Our results are corroborated by a qualitative assessment of participants’ feedback to two open-  
40 ended questions, highlighting both the overall effectiveness of the SaD tool, and the effect of  
41 geographical software familiarity on measures of experience and learning.  
42  
43

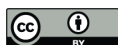

## 44 1 INTRODUCTION

### 45 1.1 The “field” environment: real, virtual, and implementation for remote learning

46 The *field* may be the single most prominent element defining geosciences. Processes relevant to  
47 Earth sciences happen in the field, and their phenomenological traces are observable in that  
48 physical space. Thus, fieldwork and the educational components of field trips and field camps are  
49 frequently held in the highest regard (Orion and Hofstein, 1994; Elkins and Elkins, 2007; Pyle,  
50 2009; Semken et al., 2018). Fieldwork remains a graduation requirement for most geoscience  
51 programs despite increasing concerns over it being inaccessible to many students, predominantly  
52 from underrepresented groups, as a result of financial, cultural, physical, and safety barriers.

53

54 Frequently, physical locations are hard to reach, or they may be impossible, dangerous, or too  
55 expensive to access (e.g., the location is on a different continent, in a restricted area, or only existed  
56 in the past) (Dolphin et al. 2019; Mead et al. 2019; Klippel et al. 2019), or from the spring of 2020  
57 to at least into the summer of 2021, physical field experiences are hindered by the global COVID-  
58 19 pandemic. But even without COVID-19, field experiences have been receiving a more critical  
59 examination. To name some of the prominent issues: recent studies have shown that the field  
60 experience is not inclusive and may be hindering retention and diversity within geoscience  
61 undergraduate programs (Hall et al., 2004; Giles et al., 2020; Morales et al., 2020). Field trips pose  
62 troubling accessibility issues excluding students with disabilities but also students who cannot  
63 afford to participate due to time or financial constraints. Field work is further challenged by an  
64 increasing awareness of harassment that is happening in the field, which is often targeting women  
65 and minority students and faculty who do not conform to the stereotypical mainstream conceptions  
66 of fieldwork, that is, it is a white, male-dominated domain. Marín-Spiotta et al. (2020) call out this  
67 issue, comparing it to the Vegas Rule, criticizing the understanding that “what happens in the field,  
68 stays in the field”.

69

70 In contrast, virtual field trips can allow instructors to expose students to widely accessible,  
71 relevant, and authentic learning experiences independent of time and space (e.g. Stumpf et al.,  
72 2008; Bursztyn et al., 2017; Mead et al. 2019; Klippel et al. 2020). Leveraging increasingly  
73 accessible high-resolution computing devices for education has the potential to positively impact



74 student engagement (Witmer and Singer, 1998; IJsselsteijn and Riva, 2003) and efforts to integrate  
75 emerging technology into the classroom to improve undergraduate success in introductory  
76 geoscience courses have further demonstrated the importance of experiential learning exemplified  
77 best by field trips (Cunningham and Lansiquot, 2019; Dolphin et al., 2019; Lansiquot and  
78 MacDonald, 2019; Moysey and Lazar, 2019). While there is some positive evidence that compares  
79 actual and virtual field trips (e.g., Klippel et al. 2019, Marshall et al. under review), there are  
80 strongly held beliefs that nothing can replace the actual field experience (numerous personal  
81 communications). Considering fieldwork without the field (i.e. in a virtual environment) is a  
82 challenging concept for Earth science educators. Consequently, virtual and remote learning in the  
83 geosciences has remained a niche product belittled by many “real” geoscientists. It required the  
84 COVID-19 pandemic to change minds and to explore remote learning opportunities for place-  
85 based education at scale and across disciplines. We have seen a dramatic influx of efforts (e.g.  
86 numerous NAGT Workshops; Earth Educators Rendezvous, 2020) and papers since 2020 that  
87 detail the creative ways a community, deprived of their traditional educational methods, has  
88 responded to distancing constraints and travel bans (e.g., Andrews et al., 2020; Bethune, 2020;  
89 Madon, 2020; Rotzein et al., 2020; Sajjadi et al. 2020; Tibaldi et al., 2020, Rotzein et al., 2021;  
90 Whitmeyer and Dordevic, 2021).

91  
92 In light of the new openness to virtual experiences, it is essential to critically look at the  
93 opportunities (i.e., breaking down long standing barriers of accessibility and inclusion) and  
94 challenges that remote learning offers to Earth educators. To establish remote learning  
95 opportunities in geoscience education, we need tools as well as empirical studies that explore the  
96 opportunities, the challenges, and the feasibility of virtual learning experiences. Many studies  
97 remain anecdotal (e.g., Marshall et al., under review) but it is time to establish research frameworks  
98 and to connect place-based education with established assessments and practices in virtual and  
99 immersive learning (Klippel et al. 2020; Petersen et al. 2020). Immersive virtual reality (iVR) is  
100 inherently a three-dimensional (3D), spatial medium (Maceachren and Brewer, 2004) and  
101 therefore offers a natural interface to all representations of data that, too, are three-dimensional in  
102 nature. However, in the time of the COVID-19 pandemic, the infrastructure to equip every student  
103 with a headset to experience iVR was not in place, nor would it have been feasible with rapid  
104 implementation of massive remote learning and abiding by physical distancing restrictions.



105 Though our research goals are ultimately to address the advancement of the science of immersive  
106 experiences, we seized the opportunity to conduct an exploratory study with a web-based desktop  
107 virtual environment.

108

109 Virtual environments, immersive or desktop-based, allow for creating realistic and flexible  
110 experiences for (virtual) field trips and the learning activities (e.g., measuring geologic structures  
111 and building mental models of spatial orientation and scale of landscape features) that are essential  
112 to practice on these field trips. Examining digital twins of outcrops through magnification,  
113 collecting samples, or measuring the stratigraphy are, with recent technological advances,  
114 straightforward to realize virtually. Over the last four years we and others have been building this  
115 capacity through combining efficient data collection in the form of 360° images, high resolution  
116 images, virtual outcrop models, and simple measuring tools. What we identified as missing are  
117 more complex geological tools and pedagogies for the application and practice of concepts such  
118 as strike and dip. Strike and dip measurements and rock identification are the fundamental aspects  
119 of any geologic map. Taking and interpreting such field measurements both require physical  
120 practice and are fundamentally essential for geoscience education, but are generally not covered  
121 extensively in virtual environments (see eRock; Cawood and Bond, 2018 for exceptions). Strike  
122 and dip measurements allow students and professionals alike to interpret structures in the Earth's  
123 crust and reconstruct deformed regional areas. It is through strike and dip that a geologist  
124 understands the regional geology from deposition to deformation.

125

## 126 ***1.2 Why field geology? Spatial reasoning in the geosciences***

127 Students in the geosciences are frequently required to reason about objects or features that occur  
128 at spatial scales too large or small to be directly observed (Gagnier et al., 2017) or hidden from  
129 view (Shipley et al., 2013; Ormand et al., 2014; Almquist et al., 2018; Zhao and Klippel, 2019;  
130 Atit et al., 2020). As a result, faculty frequently describe students' difficulty with spatial  
131 visualization as one of the barriers to success in the geosciences (e.g. Barab and Dede, 2007; Titus  
132 and Horsman, 2009; Atit et al., 2020). In particular, spatial visualization is critical to success in  
133 courses such as sedimentology and stratigraphy, structural geology, and field techniques (Gagnier  
134 et al., 2017). Tectonic and sedimentary processes usually form geo-spatially predictable features,  
135 deducible from patterns observed in surface data when one is capable of visualizing the 3D



136 geometry (Alles and Riggs, 2011). Students who possess the spatial visualization abilities  
137 necessary to succeed in these courses are also more likely to continue in the geosciences (Titus  
138 and Horsman, 2009).

139

140 The development of geological reasoning skills can be scaffolded by introducing students to a  
141 sequence of exercises starting with prototypical, accessible, and understandable physical locations,  
142 and also by introducing more experiential practice opportunities at the lower-level prior to the  
143 more challenging applications found in subsequent upper-level geoscience courses. In many post-  
144 secondary institutions, the concept of strike and dip as geological measurements is introduced in  
145 an introductory physical geology course. Later, students practice taking these measurements  
146 extensively in a field methods course, apply these methods through different lenses of geologic  
147 interpretation in subsequent focus courses, and conclude with a capstone summer field course:  
148 Field Camp. Visualizing the 3D forms and structures of our planet is a critical skill for the  
149 geosciences, and the foundation of this skill lies in a solid understanding of geological maps and  
150 strike and dip measurements.

151

### 152 ***1.3 A place for virtual and immersive technologies in place-based learning***

153 Place-based learning, such as field trips, combines the practices found in problem-based learning  
154 and experiential learning to foster a *sense of place* that generates an authentic learning  
155 environment, something valued across disciplines from social to physical sciences. Virtual  
156 environments, and especially immersive virtual environments, allow for creating learning  
157 environments grounded in the same learning theories and pedagogies as place-based education.  
158 Associated theories are discussed from different angles such as discovery, inquiry, and problem-  
159 based learning as well as experiential learning (Kolb, 2014). The focus of this article is not on  
160 learning theories and as such we are not providing an in-depth discussion of the different  
161 approaches. Similarities of these approaches are grounded in a constructivist perspective on  
162 learning (Winn, 1993; Dalgarno, 2002) building on the power of contextualizing learning through  
163 integrating prior knowledge and experience in addition to the context in which the content is  
164 embedded. Bangera and Bronwell (2014) found that benefits of these approaches include that they  
165 may offer a more effective and accessible starting point for students, including minority, low-  
166 income, and first-generation college students and can provide students with a greater ability to use

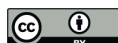

167 scientific thinking in other aspects of their lives. These approaches, and in particular discovery-  
168 based learning, have also been found to be key to successful STEM education (PCAST, 2012).  
169  
170 What role can virtual and immersive technologies play in discovery-based courses and fostering  
171 equity and access to STEM education such as geoscience field trips? The theoretical basis for the  
172 transformative nature, especially of immersive technologies for education, is rapidly growing  
173 (Dede, 2009; O'Connor and Domingo, 2017; Liu et al., 2020; Parong and Mayer, 2020; Wu et al.,  
174 2020). Characteristics of virtual and immersive technologies lend themselves to realize place-  
175 based learning (Semken et al., 2018), experiential and embodied learning (Johnson-Glenberg  
176 2018) as well as designing environments for discovery-based learning. Placing learners into the  
177 real-world with a specific problem that is relevant to a location provides a more direct connection  
178 of key learning points that students can understand and use to become more engaged (Powers,  
179 2004). Designing virtual environments in which students' learning activities are scaffolded by  
180 exercises and instruction is at the core of discovery-based learning (McComas, 2014). Geological  
181 processes can sometimes be difficult to visualize during field trips due to vast spatial and time  
182 scales— this is one area in the discipline that iVR can offer a distinct advantage. The blending of  
183 place-based and discovery-based learning, especially in immersive, virtual environments allows  
184 for the “perceptual blending of the real and the virtual world with its place-based authenticity” to  
185 enable better learning experiences (Barab and Dede, 2007, p. 2). The geosciences have long been  
186 either explicitly or implicitly using experiential, place-based exercises to foster discovery-based  
187 learning in their curriculum through, for example, field trips (Semken et al., 2018; Atit et al., 2020).  
188 Entering the 2020 Field Camp season, a crucial component of most traditional geoscience  
189 programs, instructors and students were faced with limited options: no field camp, limited and  
190 socially distanced field camp, or virtual field camp. Here it is pertinent to channel the virtuality  
191 momentum into constructive, critical, and empirically-grounded discussions of the future and  
192 utility of VR for geoscience education. It is important to note that virtual and immersive virtual  
193 experiences cannot only be designed to mimic actual field experience but that they offer  
194 opportunities beyond physical reality such as reacting to the learner in real-time (Lopes and  
195 Bidarra, 2011; Vandewaetere et al., 2013; Sajjadi et al., 2014; Shute et al., 2016).  
196



197 This paper presents a virtual Strike and Dip tool (SaD) in a web-based desktop virtual reality (dVR)  
198 environment. In addition to posing many challenges, the COVID-19 pandemic induced transition  
199 to primarily online teaching also presented geoscience educators with a new opportunity to  
200 improve introductory field-mapping instruction to be more inclusive if we are able to recreate  
201 strike and dip lab experiences through virtual environments. SaD is an interactive experience  
202 created for the purpose of guiding students to think spatially for critical geological applications by  
203 taking strike and dip measurements from 3D models of geological structures. The SaD tool mimics  
204 an introductory geologic mapping lab where students are taught strike and dip measurements using  
205 a set of angled boards with accompanying rock samples staged around a classroom (or open space)  
206 to reveal an imagined geologic structure. We have replicated this experience and traditional  
207 pedagogies in the virtual world with SaD and its series of digital planes and corresponding virtual  
208 rock samples. With this tool, students can learn what strike and dip measurements are, learn the  
209 basics of field mapping using strike and dip, as well as practice taking measurements using a  
210 variety of geological structure types. The SaD tool mimics geoscience place-based learning  
211 experiences and combines them with the flexibility and scalability of dVR. A small-scale pilot  
212 assessment (eleven participants) using the dVR SaD interface and an accompanying mapping  
213 assignment was completed in Fall 2020 and presented at a workshop (Bursztyn et al., 2021).  
214 Building on the pilot study we improved the design iteratively and rolled out SaD as a large-scale  
215 study in a 250 student introductory geoscience class. We present here a more in-depth discussion  
216 of SaD, the newly conducted empirical evaluation and analysis, a critical discussion of results  
217 showing important considerations for the future of virtual geosciences, and our vision for future  
218 SaD and virtual geoscience toolkit developments.

## 219 2 METHODS

### 220 2.1 The Strike and Dip tool

221 The representation of 3D geologic structures in 2D form requires several standard map notations,  
222 the most important of which are strike and dip measurements. New learners are typically  
223 introduced to taking strike and dip measurements using the “right hand rule” (RHR) convention.  
224 There are a few variations of the RHR, but a commonly used one (and the one used in this study)  
225 is as follows: hold the right hand flat, with the palm down on the planar geologic feature, thumb





226 extended at 90° degrees to fingers, and fingers pointing down dip (Fig. 1). Strike and dip is often  
 227 a challenging concept to teach to new learners of geology in the best of times, but the COVID-19  
 228 pandemic presented geoscience educators with a new challenge: removing the in-person field trip  
 229 instruction that provides guided practice in taking strike and dip measurements. Therefore, what  
 230 were deemed the fundamental components of in-person field instruction for learning to measure  
 231 geologic structures (identifying strike and dip planes and manipulating a compass to determine  
 232 their orientation in space), were the primary focus of the SaD tool.

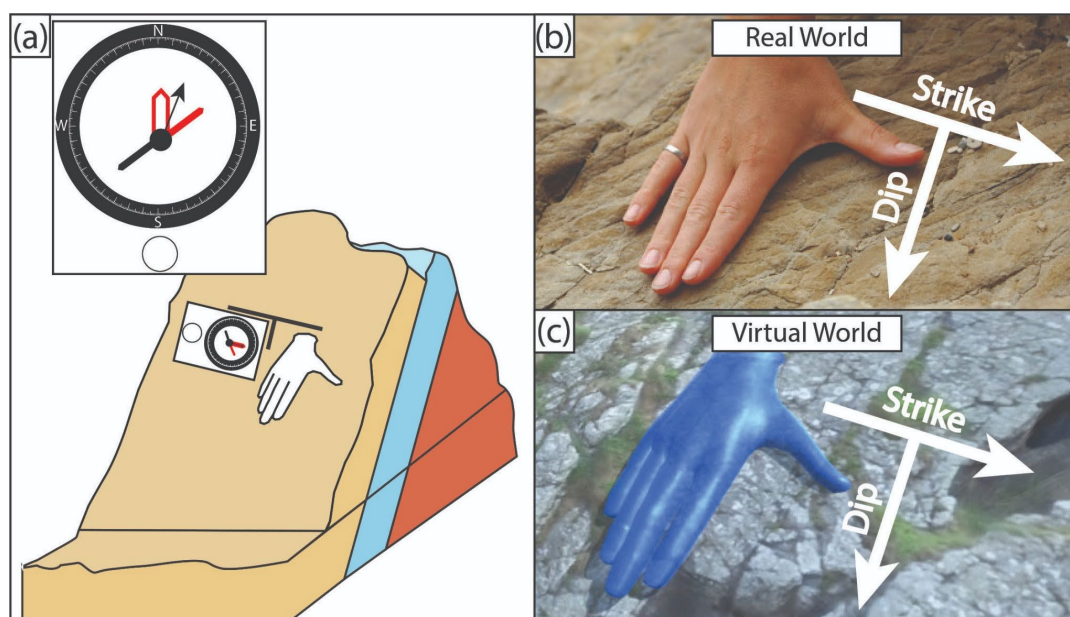

233  
 234 **Figure 1. A schematic of how one measures strike and dip on an outcrop.** (a) One measures  
 235 strike and dip on the planar surface of a rock. The strike represents the line at which the planar  
 236 rock surface intersects with any horizontal plane. The dip angle is the angle between that dipping  
 237 surface and the horizontal plane. (b) An example of one using RHR in the real world and (c) in the  
 238 SaD virtual field environment.

239

240 The primary components of the SaD tool are the *Compass Tool* and the *Small Data Panel/Data*  
 241 *Set* (Fig. 2a; 2b). The strike and dip data are recorded in the tool in the *All Data Sets* panel (Fig.  
 242 2b). Users can navigate around a 3D digital environment to locations where they can measure the  
 243 strike and dip of various slopes (platforms or outcrops). The user can locate their position via the  
 244 *Mini World Map* or fullscreen *World Map* (Fig. 2c). Once the user is positioned close to the slope

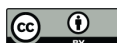

they would like to measure, they orient the position and rotation of the compass tool (using the compass control panel) to correspond to the strike or dip measurements. In the virtual environment levels, “station locations” are specifically laid out to correspond to the assignment maps.

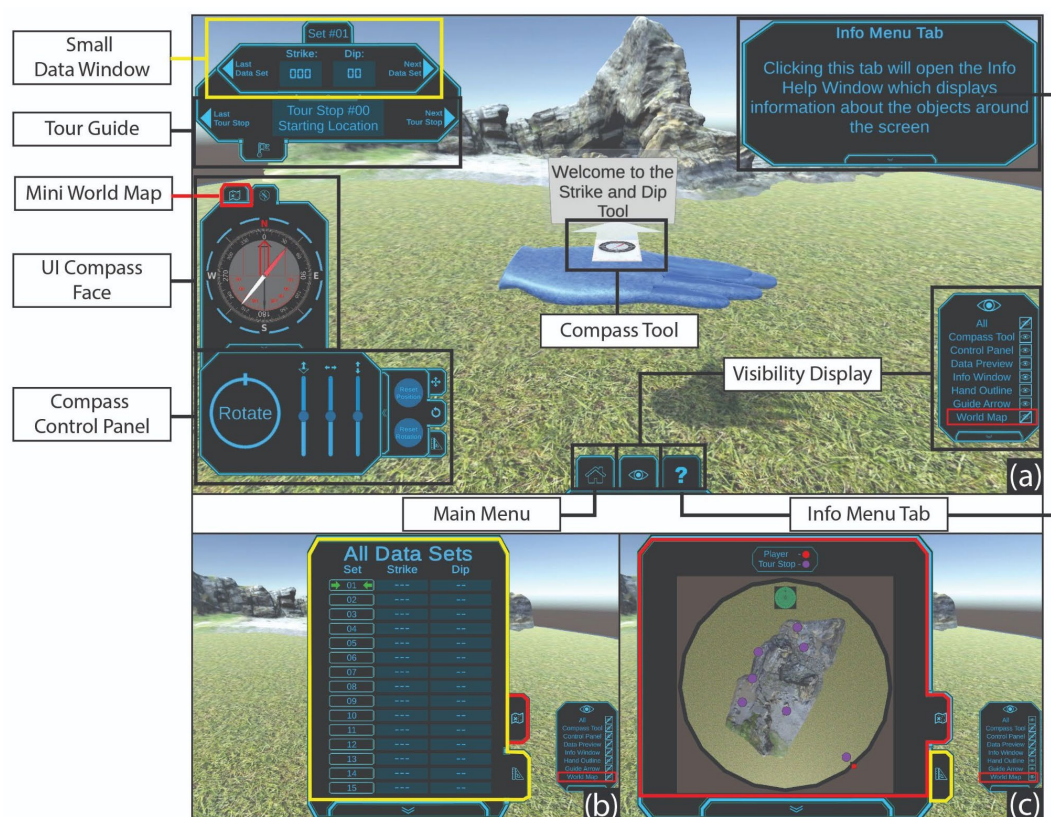

**Figure 2. The SaD HUD (Heads Up Display).** The HUD is composed of all the tools visible on screen throughout the program. Each tool can be toggled on/off depending on user preference. (a) The main HUD displays the *Small Data Window*, where the user’s most recent strike and dip measurements are displayed. The *Tour Guide* allows the user to view which stop they are presently located. The *Mini World Map* (red outline) shows the user their location in a miniature view. The user may view the compass with more ease using the *UI Compass Face* as they are measuring the orientation of the rock with the *Compass Tool*. The *Compass Control Panel* is used to position the compass on the outcrop/board to measure orientation. The *Main Menu* display allows the user to adjust the speed at which they/the compass move, the level they are on, and more personalization features. The *Info Menu Tab* gives brief information about each tool when the user hovers over

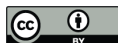

259 them. Finally, the *Visibility Display* allows the user to toggle on/off each tool. (b) If the user wishes  
260 to view their entire strike and dip log, they can click on the triangle protractor icon (yellow outline).  
261 (b) The user can also click on the *World Map* (red outline) to view their location in the environment  
262 at full screen.

263

264 There are four different setting levels within the SaD tool; from least to most challenging they are:  
265 *bumper cubes*, *bumper rocks*, *cubes*, and *rocks*. The two *cubes* levels have field stations set up  
266 within the virtual environment as rectangular planes with a virtual hand sample rock floating above  
267 (Fig. 3a). The *cubes* levels have very obvious planar surfaces for taking strike and dip  
268 measurements. The two *rocks* levels have their field stations set up with rectangular planes draped  
269 with rock “skins” that give an appearance closer to an outcrop (Fig. 3b). Depending on the  
270 complexity of the rock texture of the “skin”, the planar surfaces within the *rocks* level  
271 environments are more challenging to precisely identify. The two *bumper* levels have an algorithm  
272 that flags the strike and dip measurements in red if they are greater than 10° and 5° off, respectively.  
273 These flags enable self-correction by the students and facilitate only recording correct  
274 measurements in the data display panel.

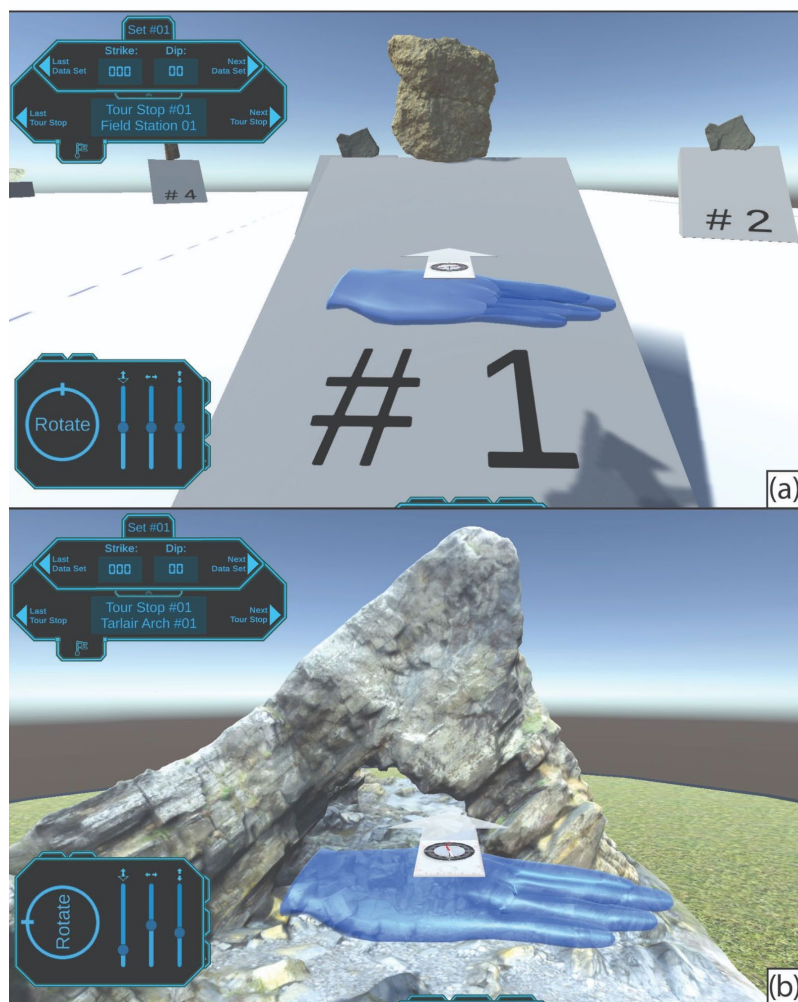

**Figure 3. The two main settings: *cubes* and *rocks*.** Each may be used with the *bumper* prefix to allow the user an error-flagging buffer when measuring platform/outcrop orientation ( $\pm 10^\circ$  strike,  $5^\circ$  dip). (a) shows the level *cubes* which replicates the classroom beginner technique of using a platform to practice taking strike and dip measurements. (b) An example of the *rocks* level, which features 3D outcrops.

### 2.2.1 Participants

A total of 147 undergraduate students (with an average age of 19.73) participated in this study. Out of this population, 98 students self-identified as male, 44 as female, three as other, and two





285 preferred not to answer. All students were recruited from an introductory geoscience class (Geosc  
286 001 - Physical Geology) at The Pennsylvania State University in the Fall 2020 semester. This class  
287 was chosen for the introductory nature of material taught including the strike and dip content  
288 already in the course curriculum. The SaD experience was embedded in this course as a laboratory  
289 assignment and students were awarded course credit for their participation. In essence, the  
290 laboratory was conducted in a context equivalent to the traditional face-to-face environment.

291

### 292 2.2.2 Procedure

293 The lab exercise was administered with the help of teaching assistants (TAs). Before the related  
294 laboratory lecture, students were assigned homework readings. During the lecture they were  
295 presented the standard introductory material on geologic maps and mapping, such as how to  
296 interpret the geologic rule of v's, measuring and plotting strike and dip on a map, drawing contacts,  
297 and constructing basic cross-sections. Earlier in the semester students completed a geologic  
298 mapping exercise from their lab workbooks for which they were provided strike and dip  
299 measurements. This lab exercise was graded and returned to the students prior to their introduction  
300 to the SaD tool. At the beginning of the SaD lab, students were shown an introductory video  
301 tutorial demonstrating how to access and utilize the SaD tool through an online dVR environment.  
302 Navigation between “field stations” within the environment using arrow keys and/or mouse, proper  
303 hand placement for right hand rule, measurement of strike and dip, as well as using the mini map  
304 feature are all demonstrated within this tutorial video. TAs provided additional office hours after  
305 the lab session and online video resources (which included a longer comprehensive tutorial video  
306 and written instructions for the SaD tool as well as a video tutorial on the basics of geologic  
307 mapping and drawing a cross-section). Participants in this study used the SaD tool at the beginner  
308 (least challenging) *bumper cubes* level.

309

310 The lab exercise was completed in a single 3-hour lab session and consisted of two parts, both  
311 tasking the students with gathering information (strike and dip, rock descriptions) with which to  
312 compile a geologic map, legend, cross section, and interpretation of geologic events that formed  
313 the area. Students were given blank base maps and fill-in-the-blank field notes to complete as they  
314 worked in the virtual environment. This aspect of the assignment tasked the students with



transcribing the data as they would in the real world and practice active mapping. Students were also provided with the rock identifications for the map areas to reduce the number of tasks they had to complete in their single lab session. The first mapping activity (Map 1) of the assignment was an optional “practice” map with five rock types, six field stations, and relatively simple geologic relationships to interpret (Fig. 4). The second mapping activity of the assignment (Map 2) was classified as the “real” map with 15 field stations and slightly more complex geologic relationships; this is the map that was evaluated for their grade in this lab assignment. Assessment of the lab exercise included evaluation of 1) the map itself, 2) the field notes, 3) the cross-section, 4) the explanation, and 5) the interpretation of geologic events that formed the area (Fig. 4).

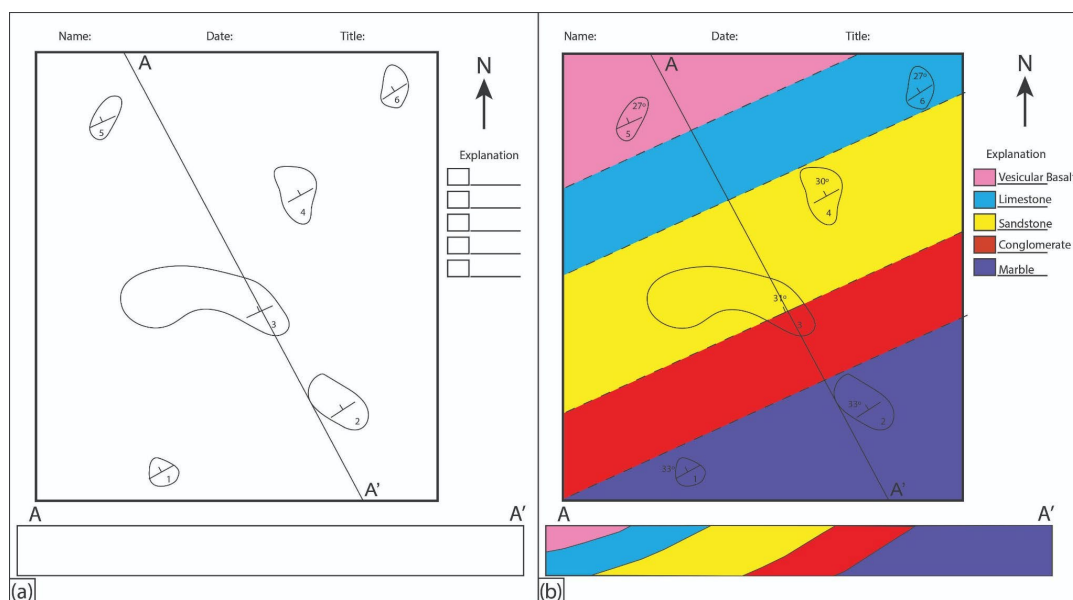

**Figure 4. The before and after examples of Map 1.** (a) Students are initially given a blank map with space to fill in the explanation and cross-section. Students are expected to fill in field notes and interpretation of geologic events on a separate piece of paper. (b) A completed map and accompanying cross-section.



## 332 2.3 Assessment measures and analyses

333 The experiences and learning of the participants were assessed using self-reported questionnaires  
334 (Appendix A). All of the questionnaire items are from established and validated instruments  
335 (summarized and connaturalized by Lee et al., 2010 and Klingenberg, 2020). As part of the  
336 demographic information, participants were asked to report on their age, gender, major and minor  
337 fields of study, and year of study. Furthermore, participants were asked to report on their  
338 familiarity with navigating geographical software such as ArcGIS, as well as their familiarity with  
339 playing computer games.

340

### 341 2.3.1 Quantitative assessment and analyses

342 After interacting with the SaD tool, the experiences (learning and general) of the participants were  
343 measured in light of *representational fidelity*, *immediacy of control*, *perceived usefulness*,  
344 *perceived ease of use*, *motivation*, *control and active learning*, *reflective thinking*, *perceived*  
345 *learning effectiveness*, *satisfaction*, and *self-efficacy* (Table 1, see also Appendix A for the full  
346 question list). All constructs were measured on a scale of 1 to 5 and individual items were averaged  
347 and collapsed into the final construct score.

348

349 In order to maintain an unbiased distribution into the low/high categories, cases where a participant  
350 scored exactly the same as the median (3 for geographical software familiarity, and 4 for gaming  
351 familiarity) were excluded. Using this approach 53 participants were identified belonging to the  
352 low-Software Familiarity category, 41 to high-Software Familiarity, 47 to low-Gaming  
353 Familiarity, and 66 to high-Gaming Familiarity. The experience and learning metrics of  
354 participants were compared based on these categories using the independent samples t-test or,  
355 alternatively, Mann-Whitney U test in case of non-normal distribution.

356 In addition to geographical software and gaming familiarity, we also explored the effect of gender  
357 on the experiences and learning of participants. As such, the experiences and learning metrics of  
358 98 male participants were compared with 44 female participants. Two-way ANOVAs were  
359 conducted to explore the interaction effect between geographical software/gaming familiarity and

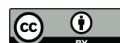

gender on the measured experience and learning metrics reported in Table 1. All analyses were performed using IBM SPSS Statistics 22.

Table 1. Metrics from participant questionnaire and their respective explanations

| Metric                                        | Explanation                                                                                                                                                                                                                                                                                           |
|-----------------------------------------------|-------------------------------------------------------------------------------------------------------------------------------------------------------------------------------------------------------------------------------------------------------------------------------------------------------|
| Representational fidelity <sup>1</sup>        | The degree of realism within the virtual environment.                                                                                                                                                                                                                                                 |
| Immediacy of control <sup>1</sup>             | The ability to change position/direction and manipulate objects within the virtual environment.                                                                                                                                                                                                       |
| Perceived usefulness <sup>1</sup>             | Two metrics for "usability" where 1) usefulness relates to the terms: important, relevant, useful, valuable; and 2) ease of use relates to the terms: convenient, controllable, easy, unburdensome.                                                                                                   |
| Perceived ease of use <sup>1</sup>            |                                                                                                                                                                                                                                                                                                       |
| Motivation <sup>1</sup>                       | Intrinsic interest based on autonomy and competence; within virtual environment derived from user control over what/when is viewed.                                                                                                                                                                   |
| Control and active learning <sup>1</sup>      | Active involvement in the learning process; learners make their own decisions about the pace, order, and flow of learning activities while completing the task.                                                                                                                                       |
| Reflective thinking <sup>1</sup>              | The generation of curiosity or confusion about what is seen being used as a catalyst for learning new concepts by making sense of observations.                                                                                                                                                       |
| Perceived learning effectiveness <sup>1</sup> | Two metrics for "learning" in the affective domain where 1) perceived effectiveness relates to generation of understanding, meaning, and interest in the topic; and 2) satisfaction relates to gaining knowledge through the virtual environment, including appreciation for the learning experience. |
| Satisfaction <sup>1</sup>                     |                                                                                                                                                                                                                                                                                                       |
| Self-efficacy <sup>2</sup>                    | The degree of confidence in understanding of the topics practiced through the virtual experience.                                                                                                                                                                                                     |

<sup>1,2</sup>metrics derived from <sup>1</sup>Lee et al., 2002 and <sup>2</sup>Klingenberg, 2020

### 2.3.2 Qualitative assessment and analyses

Within the survey, two open-ended questions were asked from the participants about their experiences with the SaD tool:

- 1) "How was your learning experience using this tool? Describe how you felt about practicing geologic mapping in a virtual environment."





369 2) “How did your experience using the strike and dip tool change between the first and second  
370 mapping activities? Explain within the context of the technology (ease of use, functionality, etc.)”

371 Combined with the quantitative analyses, qualitative analyses provide deeper insights into how the  
372 SaD tool was perceived by the participants. Based on the structured content analysis approach  
373 proposed by Schreier (2012), two independent coders examined the responses of participants and  
374 inductively generated codes that would capture their content. The coders reached agreement by  
375 grouping and rearranging the codes into the final schemas (one for each question) based on the  
376 most frequent codes. Inter-rater reliability tests based on Cohen’s Kappa were also conducted for  
377 the finalized results. To further understand these results, we examined the associations between  
378 geographical software familiarity and gaming familiarity groupings (high/low) and each of the  
379 codes using a chi-square test of independence and a post-hoc test with Bonferroni correction  
380 (resulting in an adjusted alpha of 0.0125).

## 381 **3 RESULTS**

### 382 ***3.1 Quantitative analysis***

383 We first looked at the scores for the different measured metrics (Table 1) averaged over all  
384 participants to analyze the overall assessment of the SaD tool. The results summarized in Table 2  
385 show slightly above-average scores for the *representational fidelity* and *motivation* metrics, and  
386 well-above-average scores for *immediacy of control*, *perceived usefulness*, *perceived ease of use*,  
387 *control and active learning*, *reflective thinking*, *perceived learning effectiveness*, *satisfaction*, and  
388 *self-efficacy*. These scores indicate a positive overall evaluation of the SaD tool, implying that it  
389 succeeded in eliciting a good experience for users, and therefore can be considered an effective  
390 learning instrument.

391 As a second step, we were interested in how the experience with the SaD tool was impacted by  
392 individual differences between the participants related to past exposure to geographical software  
393 and video games. The sampled population reported a slightly above-average score for familiarity  
394 with navigating geographical software ( $M=2.86$ ,  $SD=1.25$ ), and a well-above average score for  
395 familiarity with gaming ( $M=3.91$ ,  $SD=1.23$ ). The results from the analyses comparing the survey



396 scores of participants based on their software and gaming familiarity groupings are reported in  
 397 Tables 3 and 4 that follow.

Table 2. 5-point scale survey results

| Metric                           | Mean | S.D. |
|----------------------------------|------|------|
| Representational fidelity        | 2.96 | 0.99 |
| Immediacy of control             | 3.36 | 1.02 |
| Perceived usefulness             | 3.25 | 0.99 |
| Perceived ease of use            | 3.28 | 0.8  |
| Motivation                       | 2.95 | 0.83 |
| Control and active learning      | 3.33 | 0.91 |
| Reflective thinking              | 3.16 | 0.97 |
| Perceived learning effectiveness | 3.11 | 0.92 |
| Satisfaction                     | 3.12 | 0.92 |
| Self-efficacy                    | 3.37 | 0.84 |

398

399 Our results indicate statistically significant differences (by a combination of independent samples  
 400 t-tests and the Mann-Whitney test in the case of non-normal distribution) for almost all the metrics  
 401 in the general and learning experiences of students grouped by low and high software familiarity.  
 402 For *representational fidelity*, scores of the high software familiarity group were higher than those  
 403 in the low software familiarity group ( $M=3.46$ ,  $SD=0.95$  and  $M=2.59$ ,  $SD=0.92$ , respectively;  $t(92) =$   
 404  $4.461$ ,  $p < 0.001$ ). For *immediacy of control*, scores in the high familiarity group were higher  
 405 than in the low familiarity group ( $M=3.7$ ,  $SD=0.89$  and  $M=3.21$ ,  $SD=1.17$ , respectively;  $t(92) =$   
 406  $2.188$ ,  $p = 0.026$ ). For *perceived usefulness*, scores in the high familiarity group were higher than  
 407 in the low familiarity group ( $M=3.56$ ,  $SD=1$  and  $M=3.01$ ,  $SD=1.07$ , respectively;  $t(92) = 2.536$ ,  $p$   
 408  $= 0.013$ ). For *perceived ease of use*, scores in the high familiarity group were higher than in the  
 409 low familiarity group ( $Mdn = 3.75$  and  $Mdn = 2.75$ , respectively;  $U(N_{low} = 53, N_{high} = 41) = 554.500$ ,  
 410  $z = -3.979$ ,  $p < 0.001$ ). For *perceived learning effectiveness*, scores in the high familiarity group  
 411 were higher than in the low familiarity group ( $M=3.45$ ,  $SD=0.82$  and  $M=2.95$ ,  $SD=0.95$ ,  
 412 respectively;  $t(92) = 2.728$ ,  $p = 0.008$ ). For *satisfaction*, scores in the high familiarity group were  
 413 higher than in the low familiarity group ( $M=3.4$ ,  $SD=0.92$  and  $M=2.9$ ,  $SD=0.97$ , respectively;  $t(92)$   
 414  $= 2.570$ ,  $p = 0.012$ ). Lastly, scores for *self-efficacy* were greater in the high familiarity group than



415 in the low familiarity group ( $M=3.64$ ,  $SD=0.83$  and  $M=3.16$ ,  $SD=0.89$ , respectively;  $t(91) = 2.651$ ,  
 416  $p = 0.01$ ). For a complete reporting of these results refer to Table 3.

Table 3. Results of independent samples t-test comparing students grouped by software familiarity

| Metric                           | Software Familiarity | N  | Mean | Std. Dev. | <i>P</i> |
|----------------------------------|----------------------|----|------|-----------|----------|
| Representational fidelity        | Low                  | 53 | 2.59 | 0.92      | <0.001** |
|                                  | High                 | 41 | 3.46 | 0.95      |          |
|                                  | Total                | 94 | 2.97 | 1.02      |          |
| Immediacy of control             | Low                  | 53 | 3.21 | 1.17      | 0.026*   |
|                                  | High                 | 41 | 3.7  | 0.89      |          |
|                                  | Total                | 94 | 3.42 | 1.08      |          |
| Perceived usefulness             | Low                  | 53 | 3.01 | 1.07      | 0.013*   |
|                                  | High                 | 41 | 3.56 | 1         |          |
|                                  | Total                | 94 | 3.25 | 1.07      |          |
| <i>Perceived ease of use</i>     | Low                  | 52 | 2.98 | 0.76      | <0.001** |
|                                  | High                 | 41 | 3.68 | 0.77      |          |
|                                  | Total                | 93 | 3.29 | 0.84      |          |
| Motivation                       | Low                  | 53 | 2.87 | 0.88      | 0.3      |
|                                  | High                 | 41 | 3    | 0.89      |          |
|                                  | Total                | 94 | 2.93 | 0.88      |          |
| Control and active learning      | Low                  | 53 | 3.2  | 0.97      | 0.1      |
|                                  | High                 | 41 | 3.56 | 0.86      |          |
|                                  | Total                | 94 | 3.36 | 0.94      |          |
| Reflective thinking              | Low                  | 53 | 3    | 0.99      | 0.2      |
|                                  | High                 | 41 | 3.33 | 0.84      |          |
|                                  | Total                | 94 | 3.19 | 0.94      |          |
| Perceived learning effectiveness | Low                  | 53 | 2.95 | 0.95      | 0.008**  |
|                                  | High                 | 41 | 3.45 | 0.82      |          |
|                                  | Total                | 94 | 3.17 | 0.93      |          |
| Satisfaction                     | Low                  | 53 | 2.9  | 0.97      | 0.012*   |
|                                  | High                 | 41 | 3.4  | 0.92      |          |
|                                  | Total                | 94 | 3.12 | 0.97      |          |
| Self-efficacy                    | Low                  | 53 | 3.16 | 0.89      | 0.010*   |
|                                  | High                 | 40 | 3.64 | 0.83      |          |
|                                  | Total                | 93 | 3.37 | 0.89      |          |

\* $P < 0.05$ ; \*\* $P < 0.001$ ; *italics denote metrics with non-normal distribution for which Mann-Whitney test was also used*



417 A similar trend in the results was observed for students grouped by gaming familiarity. Our results  
 418 indicate statistically significant differences (by a combination of independent samples t-tests and  
 419 the Mann-Whitney test in the case of non-normal distribution) for almost all the metrics in the  
 420 general and learning experiences of students grouped by low and high gaming familiarity. For  
 421 *representational fidelity*, scores of students belonging to the high gaming familiarity group were  
 422 higher than those in the low gaming familiarity group (Mdn = 3.25 and Mdn = 3, respectively;  
 423  $U(N_{\text{low}} = 47, N_{\text{high}} = 66) = 1167.500, z = -2.266, p = 0.023$ ). For *immediacy of control*, scores of  
 424 students belonging to the high gaming familiarity group were higher than in the low gaming  
 425 familiarity group (Mdn = 3.75 and Mdn = 3, respectively;  $U(N_{\text{low}} = 47, N_{\text{high}} = 66) = 959.000, z = -$   
 426  $3.467, p = 0.001$ ). For *perceived usefulness*, scores of students belonging to the high gaming  
 427 familiarity group were higher than in the low gaming familiarity group ( $M=3.42, SD=0.74$  and  
 428  $M=2.96, SD=0.8$ , respectively;  $t(111) = 2.483, p < 0.05$ ). For *perceived ease of use*, scores of  
 429 students belonging to the high gaming familiarity group were higher than the low gaming  
 430 familiarity group ( $M=3.42, SD=0.74$  and  $M=2.95, SD=0.8$ , respectively;  $t(110) = 3.459, p < 0.01$ ).  
 431 For *control and active learning*, scores of students belonging to the high gaming familiarity group  
 432 were higher than the low gaming familiarity group ( $M=3.5, SD=0.85$  and  $M=3.12, SD=0.9$ ,  
 433 respectively;  $t(111) = 2.253, p < 0.05$ ). For *perceived learning effectiveness*, scores of students  
 434 belonging to the high gaming familiarity group were higher than the low gaming familiarity group  
 435 (Mdn = 3.43 and Mdn = 3, respectively;  $U(N_{\text{low}} = 47, N_{\text{high}} = 66) = 1147.000, z = -2.357, p = 0.018$ ).  
 436 For *satisfaction*, scores of students belonging to the high gaming familiarity group were higher  
 437 than the low gaming familiarity group (Mdn = 3.42 and Mdn = 3, respectively;  $U(N_{\text{low}} = 47, N_{\text{high}} =$   
 438  $66) = 1122.000, z = -2.504, p = 0.012$ ). Lastly, for *self-efficacy*, scores of students belonging to the  
 439 high gaming familiarity group were higher than the low gaming familiarity group ( $M=3.55,$   
 440  $SD=0.78$  and  $M=2.86, SD=0.92$ , respectively;  $t(110) = 3.296, p < 0.01$ ). For a complete reporting  
 441 of these results refer to Table 4.

442 With respect to gender, our results indicate that male students ( $M = 3.48, SD = 0.83$ ) reported  
 443 significantly higher scores for self-efficacy than female students ( $M = 3.12, SD = 0.85$ ),  $t(139) =$   
 444  $2.329, p < 0.05$ ). No other significant differences for gender were shown to exist.

445

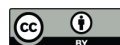

Table 4. Results of independent samples t-test comparing students grouped by gaming familiarity

| Metric                                  | Gaming Familiarity | N   | Mean | Std. Dev. | P       |
|-----------------------------------------|--------------------|-----|------|-----------|---------|
| <i>Representational fidelity</i>        | Low                | 47  | 2.69 | 1.06      | 0.023*  |
|                                         | High               | 66  | 3.13 | 0.92      |         |
|                                         | Total              | 113 | 2.95 | 1         |         |
| <i>Immediacy of control</i>             | Low                | 47  | 3    | 1.08      | 0.001** |
|                                         | High               | 66  | 3.7  | 0.86      |         |
|                                         | Total              | 113 | 3.4  | 1         |         |
| Perceived usefulness                    | Low                | 47  | 2.96 | 0.8       | 0.015*  |
|                                         | High               | 66  | 3.42 | 0.74      |         |
|                                         | Total              | 113 | 3.23 | 0.98      |         |
| Perceived ease of use                   | Low                | 47  | 2.95 | 0.8       | 0.001** |
|                                         | High               | 65  | 3.42 | 0.74      |         |
|                                         | Total              | 112 | 3.25 | 0.8       |         |
| Motivation                              | Low                | 47  | 2.77 | 0.92      | 0.131   |
|                                         | High               | 66  | 3.03 | 0.81      |         |
|                                         | Total              | 113 | 2.92 | 0.86      |         |
| Control and active learning             | Low                | 47  | 3.12 | 0.9       | 0.027*  |
|                                         | High               | 66  | 3.5  | 0.85      |         |
|                                         | Total              | 113 | 3.34 | 0.89      |         |
| Reflective thinking                     | Low                | 47  | 2.93 | 1.1       | 0.05    |
|                                         | High               | 66  | 3.32 | 0.9       |         |
|                                         | Total              | 113 | 3.15 | 1.01      |         |
| <i>Perceived learning effectiveness</i> | Low                | 47  | 2.82 | 0.98      | 0.018*  |
|                                         | High               | 66  | 3.27 | 0.88      |         |
|                                         | Total              | 113 | 3.08 | 0.95      |         |
| <i>Satisfaction</i>                     | Low                | 47  | 2.86 | 0.92      | 0.012*  |
|                                         | High               | 66  | 3.28 | 0.89      |         |
|                                         | Total              | 113 | 3.1  | 0.92      |         |
| Self-efficacy                           | Low                | 47  | 3.01 | 0.91      | 0.001** |
|                                         | High               | 65  | 3.55 | 0.78      |         |
|                                         | Total              | 112 | 3.32 | 0.88      |         |

\* $P < 0.05$ ; \*\* $P < 0.001$ ; italics denote metrics with non-normal distribution for which Mann-Whitney test was also used



447 Finally, we were interested in investigating the possible interactions between geographical  
448 software/gaming familiarity and gender on the experience and learning metrics of participants.  
449 Two-way analyses of variance (ANOVAs) were conducted for this inquiry and revealed no  
450 statistically significant results.

451

452 Our results indicate that the individual differences among students in light of their prior familiarity  
453 with navigating geographical software as well as their familiarity with gaming has a pronounced  
454 effect on their experiences. The unveiled trend indicates that higher familiarity with either  
455 geographical software or gaming leads to a significantly better experience with the SaD  
456 tool. Importantly, no effects of gender or significant interactions between software/game  
457 familiarity and gender on the experience and learning metrics of participants were observed.

458

### 459 **3.2 Qualitative analysis**

460 The results from our qualitative analysis of the two open-ended survey questions are reported in  
461 Tables 6 and 7 that follow. With respect to the first open-ended question, “How was your learning  
462 experience using this tool?”, almost 18% of participants reported that the tool was easy to use  
463 while nearly 17% reported that the tool was difficult to use (Table 5). For example, two contrasting  
464 participant comments are: “it was easy to navigate” and “I felt confused and overwhelmed on the  
465 program almost the entire time I was using it...”. Related to useability, almost 11% of participants  
466 indicated that the controls for using the tool are not intuitive, e.g.: “it was very frustrating to try  
467 and rotate the compass to the right spot...”. Another 8% indicated that the tool had a high and  
468 steep learning curve, e.g.: “firstly, I thought it is hard but then I got used to it”. Furthermore, about  
469 12.5% of participants had performance issues such as lagging and crashing, e.g.: “it was a little  
470 slow, as it did not respond immediately to my inputs...”.

471 Importantly, a little over 15% of participants reported that the tool has increased their interest in  
472 learning the topic and 22% reported that they perceived the tool as effective for learning, while  
473 only 6% reported that they did not perceive the tool to be effective for learning. For example, two  
474 contrasting participant comments about the experience are: “...I felt like I was doing actual  
475 work...” and “...I think that an in-person experience would be more effective to understand strike



476 and dip...”. Related to the latter example, 11% of participants indicated that they would prefer the  
477 real environment to the virtual for learning about this topic.

478 Finally, our results show that 49% of the sampled population had an overall positive impression  
479 of the tool whereas only 17% and 13% reported an overall negative or overall mixed impression,  
480 respectively. Others did not express clear inclination.

481 A chi-square test of independence revealed that participants with low geographical software  
482 familiarity had a much higher overall negative impression (29.5 %) compared to those with a high  
483 geographical software familiarity (2.85 %),  $\chi^2(1, N = 79) = 9.52, p < 0.01$ . The post-hoc test with  
484 Bonferroni correction was in agreement that negative impressions are significantly more common  
485 for participants in the low geographical software familiarity category ( $p < 0.01$ ). No other  
486 significant differences between the geographical software familiarity categories or game  
487 familiarity categories were observed.



Table 5. Qualitative analysis results for open-ended learning experience question

| Code                                    | Example                                                                                                                                                          | Cohen's<br>Kappa | % of<br>total | % of<br>H-SF | % of<br>L-SF | % of<br>H-GF | % of<br>L-GF |
|-----------------------------------------|------------------------------------------------------------------------------------------------------------------------------------------------------------------|------------------|---------------|--------------|--------------|--------------|--------------|
| Easy to use                             | "...It was fun and easy to use all around..."                                                                                                                    | 0.838            | 17.85         | 22.85        | 11.36        | 21.05        | 12.82        |
| Difficult to use                        | "I felt confused and overwhelmed on the program almost the entire time I was using it"                                                                           | 0.968            | 16.96         | 5.70         | 27.27        | 14.03        | 17.94        |
| Controls not intuitive                  | "...I struggled with getting everything in place each time and it was hard to fix my dip if I got that wrong..."                                                 | 0.799            | 10.71         | 8.57         | 13.63        | 10.52        | 10.25        |
| Performance issues                      | "...It was a little slow, as it did not respond immediately to my inputs..."                                                                                     | 1.000            | 12.50         | 11.42        | 20.45        | 17.54        | 5.12         |
| Caused high levels of interest          | "...I feel like I actually understand what a strike and dip measurement is..."                                                                                   | 0.184            | 15.17         | 17.14        | 9.00         | 15.78        | 7.69         |
| Steep learning curve                    | "Initially I didn't know how to use it, so it was frustrating, but I looked at the short tutorial and it made it a lot easier"                                   | 0.936            | 8.03          | 5.71         | 6.81         | 8.77         | 5.12         |
| Prefer the real environment             | "...I prefer doing things in real life, than virtual..."                                                                                                         | 0.874            | 11.60         | 11.42        | 15.90        | 15.78        | 10.25        |
| Perceived as effective for learning     | "...I felt like I was doing actual work..."                                                                                                                      | 0.858            | 22.32         | 34.28        | 15.90        | 26.30        | 20.51        |
| Perceived as not effective for learning | "... was not effective in learning because I was only able to see one strike dip at a time and could not figure out how they related to each other spatially..." | 0.918            | 6.25          | 2.85         | 6.81         | 0.00         | 10.25        |
| Overall impression positive             | "I feel like this helped me visualize and understand strike and dip and geologic mapping much better than before"                                                | 0.911            | 49.10         | 57.14        | 43.18        | 50.87        | 51.28        |
| Overall impression negative             | "...I don't like this class to begin with, and I this activity did not make me like this class any more than before..."                                          | 0.934            | 16.96         | 2.85         | 29.50        | 14.03        | 20.51        |
| Overall impression mixed                | "It was cool but frustrating"                                                                                                                                    | 0.769            | 13.39         | 14.30        | 15.90        | 17.50        | 5.12         |

*H-SF=high software familiarity, L-SF=low software familiarity, H-GF=high gaming familiarity, L-GF=low gaming familiarity*



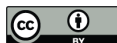

489 With respect to the second question, “How did your experience ... change between ... mapping  
490 activities?”, 62.5% of participants reported that their experience improved from the first to the  
491 second mapping activity (Table 6). More than half of those who reported an improvement to their  
492 experience explicitly mentioned that their experience was easier in the second mapping activity  
493 because of practicing in the first mapping activity. About 20% of participants reported that their  
494 experience remained the same, and 18% reported that their experience worsened from the first to  
495 the second mapping activity. From those who reported that their experience worsened, 12.4%  
496 stated that the second mapping activity was more difficult and almost 8% stated that they  
497 experienced more lag in the second mapping activity. A chi-square test of independence revealed  
498 no significant differences between geographical software familiarity categories or gaming  
499 familiarity categories and the codes. In summary, the qualitative analysis of the second question  
500 indicates that more exposure to the SaD tool improves the overall experience for users but the fact  
501 that second activity is more demanding in terms of required graphic power resulted in more  
502 performance issues.  
503

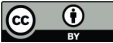

Table 6. Qualitative analysis results for open-ended experience change across activities question

| Code     | Example                                                                                         | Cohen's<br>Kappa | % of<br>total | % of<br>H-SF | % of<br>L-SF | % of<br>H-GF | % of<br>L-GF |
|----------|-------------------------------------------------------------------------------------------------|------------------|---------------|--------------|--------------|--------------|--------------|
| Improved | "...In the second activity I was more used to it and it was easier to take the measurements..." | 0.911            | 62.5          | 68.1         | 64.2         | 66.6         | 66.6         |
|          | "It became easier for me to use the strike and dip technique"                                   |                  |               |              |              |              |              |
| Worsened | "...The second map was harder because some of them didn't have strike or dip"                   |                  |               |              |              |              |              |
|          | "...The second map ended up lagging and ran slower and slower the longer I used it"             | 0.845            | 18            | 13.6         | 10.7         | 13.8         | 14.8         |
| Same     | "...I noticed no major changes between mapping activities..."                                   |                  |               |              |              |              |              |
|          | "It was a poor experience both times..."                                                        | 0.916            | 20.83         | 18.1         | 28.5         | 19.4         | 22.2         |



#### 505 4 DISCUSSION AND CONCLUSIONS

506 Using the SaD tool, an entirely remote introductory field mapping exercise was successfully  
507 completed by students during the COVID-19 pandemic. This field mapping exercise replicated  
508 exactly, in the digital world, the tasks the students would have normally completed in an in-person  
509 lab: measuring strike and dip of staged “outcrops”, using those data to assemble a map, and  
510 interpreting the geologic history for that “region”. Using traditional aspects in a new way, this  
511 environment not only taught students how to visualize the orientation of strike and dip on a rock  
512 plane, but also how to correctly line up a compass using the RHR convention. It also challenged  
513 students to conceptualize and infer overall geologic relationships using the measurements they  
514 took at each individual 3D outcrop model. From a teaching perspective, the SaD tool also provides  
515 three distinct advantages: 1) the time required to set up a staged beginner mapping area is  
516 conserved, which in turn permits 2) multiple mapping environments to be explored by the students  
517 (e.g. “practice” Map 1 followed by “real” Map 2) with different levels of challenge (e.g. *bumper*  
518 *cubes* vs *bumper rocks*) available to facilitate individualized learning; as well as 3) the *bumper*  
519 setting flagging incorrect measurements, providing the opportunity for self-correction. In a regular  
520 face-to-face introductory mapping lab, there is realistically only time to set up one staged mapping  
521 environment and during the exercise, the instructor is trying to assist individual students with a  
522 wide range of issues from using their left hand, to holding the compass upside down, to having  
523 made and mapped several incorrect measurements without realizing their error. SaD dramatically  
524 increased efficient instruction through error flagging alone.

525

526 Both quantitative and qualitative results suggest that the students reacted overall positively to the  
527 SaD tool. Further, qualitative results suggest that SaD was an effective learning instrument for the  
528 mapping exercise, as participants reported an increase in understanding of strike and dip from Map  
529 1 to Map 2. These findings are in agreement with those from the earlier pilot study (n=11) using  
530 the same software (Bursztyn et al., 2021) and suggest that SaD can be considered an effective  
531 learning instrument. The quantitative results indicate that students familiar with other geographical  
532 software or gaming software had a much better experience in light of *representational fidelity*,  
533 *immediacy of control*, *perceived usefulness*, *perceived ease of use*, *control* and *active learning*,



534 *perceived learning effectiveness, satisfaction, and self-efficacy* compared to those who were  
535 unfamiliar. This is important as it suggests that introducing students to virtual learning  
536 environments more frequently will have positive effects on their learning experience.

537

538 Although the results of the qualitative analysis are valuable on their own, when considering the  
539 prior individual experiences of users in relation to their open-ended feedback, interesting themes  
540 emerge. When comparing participants in the high geographical software familiarity group to those  
541 in the low geographical software familiarity group, we see that those in the high familiarity group  
542 perceived the tool to be much easier to use and controls to be more intuitive. Similarly, participants  
543 in the high familiarity group experienced less performance issues and had a less steep learning  
544 curve. It was also the case that participants in this group had a lower tendency to claim preference  
545 for the real environment over the virtual one and these participants determined the tool to be  
546 effective for learning at much higher rates than those in the low familiarity group. The high  
547 geographical software familiarity grouping reported a much higher overall positive impression and  
548 much lower overall negative impression of the tool. Finally, a very similar trend is seen when  
549 comparing participants of high and low gaming familiarity. Apart from performance issues and  
550 learning curve, in almost all the other metrics, participants in the high gaming familiarity group  
551 reported a much better experience than those in the low gaming familiarity group. The qualitative  
552 results align with the quantitative results, which further strengthens the conclusion that students  
553 with higher geographical software familiarity and to some degree, gaming familiarity, gained more  
554 cognitively and psychologically from their SaD experience. Our results corroborate observations  
555 made in other experiments evaluating the importance and impact of prior familiarity with similar  
556 software on the experiences and performance of learners in virtual environments (Bagher et al.,  
557 under review). Importantly, the absence of effects of gender on the participants' experience and  
558 learning metrics suggests an equitable learning experience across gender demographics.

559

560 To further explore some of the feedback received through the open-ended questions, we address  
561 comments geared towards issues with usability, fidelity to real world environments, and limitations  
562 with software.



#### 563 ***4.1 Usability and fidelity to learning mapping in the real world***

564 Notably, most of the negative comments with the SaD tool are with regard to lag and frustration  
565 of becoming familiar with the settings and controls (Tables 5 and 6) and not the sometimes  
566 confusing aspect of taking and interpreting strike and dip measurements. Within this lab, the 3D  
567 virtual outcrops presented had easy to determine strike planes. Because the RHR convention was  
568 represented with a digital right hand that could be manipulated, users could easily determine dip  
569 direction and therefore angle. Furthermore, because participants were using the tool with the  
570 beginner *bumper* setting, they were alerted to any incorrect measurements instantaneously.

571 In the field without a perfectly staged 3D outcrop, it is sometimes difficult to determine the true  
572 strike of a lithologic unit, and therefore easy to accidentally measure an apparent plane instead of  
573 a true one. Although no “lag” time is associated with field mapping (except perhaps prolonged  
574 snack breaks), good, easily determinable strike and dip outcrops are not always abundant. This  
575 forces introductory students to learn and practice strike and dip on outcrops that are overly  
576 complicated for new learners. For example, Appalachian State students must travel one to two  
577 hours each way to the Valley and Ridge Province where they learn how to map in “sedimentary”  
578 units that are, in reality, slightly metamorphosed meta-sedimentary rocks, and sometimes have  
579 slight foliation or crystallization. Furthermore, the region is heavily deformed with outcrop-  
580 regional sized folds and faults. Finding appropriate outcrops for introductory students is difficult  
581 and those that are found are on steep terrain and therefore not wholly accessible.

582 Interestingly enough, most of the comments made about the reactivity of the controls are  
583 variations of comments heard as an instructor from students in the field. For example, “Initially I  
584 didn't know how to use it, so it was frustrating...” and “...At first it was a bit overwhelming, but  
585 with some instruction it became much easier and quicker to use...”. This is a common comment  
586 from students at the end of the semester in a field methods course. Another comment, “It was very  
587 frustrating to try and rotate the compass to the right spot...” or “...I struggled with getting  
588 everything in place each time...”, is a staple in regards to placing the compass when students first  
589 get into the field. The comment regarding only seeing one strike and dip measurement at a time  
590 (“...was not effective in learning because I was only able to see one strike dip at a time and could  
591 not figure out how they related to each other spatially...”) is also not an uncommon struggle in the



592 field. Most places do not have kilometer long outcrops in which to visualize the structures of the  
593 whole area. One must actively map each individual strike and dip measurement one at a time, only  
594 interpreting the structures once there are enough points across the map to put together the geologic  
595 story. Similarly, SaD users may also view their “map” with the *World Map* feature (Fig. 2c) and  
596 visualize the region in its entirety. Lastly, the comment “I felt confused and overwhelmed on the  
597 program almost the entire time I was using it” is so common in the field that many instructors  
598 address this as a known occurrence and the statement is frequently countered with some version  
599 of ‘You may be lost the majority of the time, the key is to recognize when you are “found” and to  
600 fill in the gaps.’

601 Despite the participants in this study having never actually mapped geology before, let alone in a  
602 real-world environment, there were several confident comments that *in person experience would*  
603 *be more effective for learning and alleviating confusion* than the SaD tool. These comments are  
604 difficult to address with their “the grass is always greener” perspective. This type of perspective  
605 was seen in a study by Stumpf et al., (2008), who found that students exposed to an in-person only  
606 field trip claimed preference for the virtual version while students in the virtual field trip group  
607 decreed the opposite.

608  
609 The thought that nothing can compare with a real-world field trip is predominant among some  
610 geologists but it is one that is exclusive and unimaginative. With the development of realistic  
611 virtual desktop environments and iVR experiences, along with public access to texture and  
612 material designers like Substance by Adobe, it is becoming more possible and pertinent to develop  
613 virtual environments that mimic real world structures, and therefore their value for replicating  
614 place- or discovery-based learning (e.g. O’Connor and Domingo, 2017; Atit et al., 2020; Parong  
615 and Mayer, 2020; Wu et al., 2020). With iVR, users can even navigate through and interact with  
616 virtual environments in a very realistic way, which we suggest is also valuable in discovery-based  
617 learning (e.g. Liu et al., 2020; Parong and Mayer, 2020; Wu et al., 2020).

618 The results of this study point to a mix of positive evaluation and room for improvements of the  
619 SaD tool. Considering that SaD is still evolving, it is expected to receive comments related to  
620 usability issues from the participants. Such comments can help us better identify the shortcomings  
621 of this tool and plan for future improvements. It is important to emphasize that our results also



622 indicate that a high number of participants perceived the tool as useful for their learning and the  
623 overall impression of the tool is positive.

624

## 625 **4.2 Limitations and future work**

### 626 *4.2.1. Procedural limitations*

627 For this study, SaD was used in a single lab session following an earlier workbook-style mapping  
628 exercise. Although all students were assigned the earlier mapping exercise, only those who  
629 completed it had it returned and available for their reference during the subsequent SaD lab  
630 activity. Furthermore, it is unclear how many students, if any, referred back to this exercise for  
631 reminders or guidance during the SaD exercise. Because the SaD lab was administered during a  
632 single lab session, Map 1 (the practice map) was made optional to alleviate the pressure of potential  
633 time constraints. Consequently, not all students completed the practice map prior to the main  
634 assignment (Map 2). The small-scale pilot study (Bursztyn et al., 2021) built in two work and  
635 submission sessions to the exercise with instructor feedback following the first “practice” mapping  
636 activity. We were unable to follow this procedure due to curriculum scheduling complications for  
637 the present study and this limitation resulted in students either opting to not complete the first  
638 mapping exercise, or completing both with the pressure of time-constraints.

639

640 Within the dVR experience itself, participants were limited to using the SaD tool restricted to the  
641 beginner *bumper cubes* setting. With *bumper cubes* incorrect measurements are flagged, but  
642 students do not know why they are wrong or how to correct themselves. It will be important to  
643 develop the SaD tool to include adaptive interventions such as individualized embedded hints and  
644 mapping guidance that would facilitate the learning experience of beginner mappers using the  
645 *bumper* settings. In VR environments it is feasible to implement adaptive learning strategies, such  
646 as adaptive interventions, hints, and feedback (Peirce and Wade, 2010; Zaharias et al., 2012), in  
647 addition to more dynamic strategies in the form of difficulty and learning content adjustments  
648 within the learning experience (Hocine et al., 2015; Streicher and Smeddinck, 2016). Such  
649 strategies can support personalized experiences for learners exhibiting different levels of abilities  
650 and competencies in relation to the learning experience. In the case of our *bumper* settings,



651 adaptive interventions might provide feedback on the nature of the error the user has made. It will  
652 also be important to study the effect of including such adaptive interventions into the learning  
653 environment, both on student learning and on user experience.

654

655 Finally, from an individual differences perspective, the exclusion of ethnicity from the participant  
656 questionnaire survey was an oversight not realized until too late in the procedure to be corrected.  
657 Critically examining individual differences in the context of the learning experience will continue  
658 to be of utmost importance moving forward. Furthermore, in this study, we did not collect the  
659 scores from the student work. Individual differences are not only important to consider for the  
660 useability of the instrument, but also critical to examine the effect the tool has on student learning.

661

#### 662 *4.2.2 Technical limitations*

663 Several students experienced technical difficulties including their computers crashing, the SaD  
664 tool lagging, and difficulty maneuvering within the virtual environment. Between the pilot study  
665 (Bursztyn et al., 2021) and this study we tried to address the lagging concern, knowing that many  
666 students would not have access to gaming computers with high-powered video cards. Visual lag  
667 can be reduced by minimizing the complexity of the 3D rock models through reducing the number  
668 of polygons for each 3D model. However, the tradeoff in this regard is that the 3D models with  
669 reduced polygons will at some point become no longer recognizable as particular rock types. We  
670 have since been exploring other avenues such as applying detailed texture maps over simplified  
671 geometries. Through the use of programs such as Adobe Substance highly detailed textures can be  
672 created that give the appearance of complex 3D geometry, many of which are digital twins for  
673 diagnostic rock textures. These textures can then be applied to 3D models with simple geometry  
674 (such as cubes) while retaining the visual appearance and detail of highly complex 3D models but  
675 without creating lag.

#### 676 **5 Outlook: Advancing inclusivity, accessibility, and realism**

677 Beyond the students' technical difficulties, we also recognize that the interaction fidelity of  
678 maneuvering in a two-dimensional dVR environment representing a complex 3D natural  
679 environment is limited. Navigation within such an environment is complex and requires training





680 (key combinations, mouse and/or trackpad to maneuver and position the compass vs walking up  
681 to a surface and using one's hands). On the other hand, it has been shown that virtual environments,  
682 especially developed for web-based distribution and mobile devices, can remove barriers to  
683 accessibility and create a culture of inclusion in geoscience classrooms (O'Sullivan and Kearney,  
684 2018; Chenrai and Jitmahantakul, 2019). We believe that with immersive VR technology  
685 becoming widely accessible, we can achieve both: accessibility and natural interactivity.  
686 Immersive VR offers 3D-in-3D interfaces which are ideal for representing the 3D data of  
687 geological structures as well as realizing the 3D interactions of measuring them (e.g., positioning  
688 a compass on a planar surface). The iVR interface of SaD has been developed this spring and we  
689 intend to leverage this version of the tool to evaluate place-based learning and 3D interactions  
690 within that environment in the coming fall semester.

691  
692 Research on virtual learning environments has shown that the immersive, interactive, and 3D  
693 nature of iVR can potentially reduce the performance gap between students with high and low  
694 spatial abilities (Simpson et al., 2017; Lages and Bowman, 2018) which have been shown critical  
695 for STEM education (Newcombe, 2010). Immersive 3D visualizations can demonstrate the extent  
696 of landscapes and geological features in a form that is beneficial for students to develop spatial  
697 thinking, since they closely mirror everyday perceptual experience (Simpson, 2020). This  
698 mirroring capability is important in the context of the current study where students expressed  
699 preference for a more real-world experience. In addition, current iVR technology allows for the  
700 integration of high-fidelity perceptual information (e.g., position, orientation, shape, size, or  
701 motion) and additional abstract information (e.g., video, graphs, and text) into a single virtual  
702 environment, which would enable the teaching of complex geological concepts through  
703 understandable visual demonstrations (Bowman et al., 2003). Such explicit graphical presentations  
704 might act as a “cognitive prosthetic” for students with lower spatial ability (Mayer and Sims, 1994;  
705 Höffler and Leutner, 2011; Jamieson et al., 2014; Zhao et al., 2020); that is, low ability learners  
706 could gain a particular benefit from accessing an information-rich iVR environment as they have  
707 difficulty mentally constructing their own representation when learning about geological features  
708 and processes from the textbook or a traditional field trip alone. This is also important for the  
709 present study as it has been shown that low spatial ability learners can benefit more from a desktop  
710 VR application in comparison with high spatial ability learners (Lee et al., 2009). Future empirical



711 evaluations of SaD comparing immersive versus non-immersive instances will include a stronger  
712 focus on spatial abilities.

713

714 The SaD tool continues to be developed and evolve with each iteration into becoming a more  
715 realistic digital twin for teaching field geology technique. The next steps for this tool are mapped  
716 out, focused on creating 3D models that mirror real world lithologic features (including, but not  
717 limited to, individual sand grains, identifiable fossils, foliation and crystalline textures). As a  
718 community, we are ever closer to creating complete, realistic virtual environments for an inclusive  
719 and accessible geology field class with world class “outcrops” that mimic those one sees in the  
720 classic geology field camps and trips hosted in the Western United States.

721



## Appendix A: Full survey of questions asked to students participating in the SaD study

### Section A: Questionnaire

We would like to learn about your background and previous experience as it is relevant to this study. We have a few questions we would like your honest answers to. After that, we would ask about your experience with the web application used to explore the maps.

**A1. Please enter your school email address. (i.e name@psu.edu)**

**A2. By reviewing the consent form, I agree to take part in the study  
AND I am at least 18 years old (the collected data is anonymized).**

Yes, I would like to participate in the study ☐

No, I only do this exercise as a class assignment ☐

**A3. What is your age?**

**A4. To which gender identity do you most identify?**

Male ☐

Female ☐

Other ☐

Prefer not to say ☐

**A5. What are your major and minor fields of study?**

**A6. What year of study are you in?**

Freshman ☐

Sophomore ☐

Junior ☐

Senior ☐



**A7. How familiar are you navigating in geographical softwares such as ArcGIS, for instance, zoom in or dragging the map?**

Not at all

1

2

3

4

Very Familiar5

☐
☐
☐
☐
☐

**A8. How familiar are you with video games of any kind (gaming consoles, PC, or on phones)?**

Not at all

1

2

3

4

Very Familiar5

☐
☐
☐
☐
☐

**A9. Please rate the following questions from 1 (Strongly Disagree) to 5 (Strongly Agree).**

Strongly Disagree 1

Strongly Agree5

The realism of the mapping environment models motivates me to learn

☐
☐
☐
☐
☐

The realism of the mapping environment models helps to enhance my understanding

☐
☐
☐
☐
☐

**A10. Please rate the following questions from 1 (Strongly Disagree) to 5 (Strongly Agree).**

Strongly Disagree 1

Strongly Agree 5

The ability to change the view position of the 3-D objects allows me to learn better

☐
☐
☐
☐
☐

The ability to change the view position of the 3-D objects makes learning more motivating and interesting

☐
☐
☐
☐
☐

The ability to manipulate the objects within the virtual environment makes learning more motivating and interesting

☐
☐
☐
☐
☐

The ability to manipulate the objects in real time helps to enhance my understanding

☐
☐
☐
☐
☐

**A11. Please rate the following questions from 1 (Strongly Disagree) to 5 (Strongly Agree).**

Strongly Disagree 1

Strongly Agree5

Using this type of computer program as a tool for learning in classroom increase/will increase my learning and academic performance

☐
☐
☐
☐
☐

Using this type of computer program enhances/will enhance the effectiveness on my learning

☐
☐
☐
☐
☐

This type of computer program allows/will allow me to progress at my own pace

☐
☐
☐
☐
☐

This type of computer program is useful in supporting my learning

☐
☐
☐
☐
☐



**A12. Please rate the following questions from 1 (Strongly Disagree) to 5 (Strongly Agree).**

|                                                                                                            | Strongly<br>Disagree 1   | 2                        | 3                        | 4                        | Strongly<br>Agree 5      |
|------------------------------------------------------------------------------------------------------------|--------------------------|--------------------------|--------------------------|--------------------------|--------------------------|
| Learning to operate this type of computer program is easy for me                                           | <input type="checkbox"/> | <input type="checkbox"/> | <input type="checkbox"/> | <input type="checkbox"/> | <input type="checkbox"/> |
| Learning how to use this type of computer program as an assignment is too complicated and difficult for me | <input type="checkbox"/> | <input type="checkbox"/> | <input type="checkbox"/> | <input type="checkbox"/> | <input type="checkbox"/> |
| It is easy for me to find information in this computer program                                             | <input type="checkbox"/> | <input type="checkbox"/> | <input type="checkbox"/> | <input type="checkbox"/> | <input type="checkbox"/> |
| Overall, I think this type of computer program is easy to use                                              | <input type="checkbox"/> | <input type="checkbox"/> | <input type="checkbox"/> | <input type="checkbox"/> | <input type="checkbox"/> |

**A13. Please rate the following questions from 1 (Strongly Disagree) to 5 (Strongly Agree).**

|                                                                       | Not at all<br>1          |                          |                          |                          | Strongly<br>Agree 5      |
|-----------------------------------------------------------------------|--------------------------|--------------------------|--------------------------|--------------------------|--------------------------|
| I enjoyed this type of web application for geologic mapping very much | <input type="checkbox"/> | <input type="checkbox"/> | <input type="checkbox"/> | <input type="checkbox"/> | <input type="checkbox"/> |
| I would describe this type of web application as very interesting     | <input type="checkbox"/> | <input type="checkbox"/> | <input type="checkbox"/> | <input type="checkbox"/> | <input type="checkbox"/> |
| This type of web application did not hold my attention                | <input type="checkbox"/> | <input type="checkbox"/> | <input type="checkbox"/> | <input type="checkbox"/> | <input type="checkbox"/> |
| Measuring Strike and Dips are fun to perform                          | <input type="checkbox"/> | <input type="checkbox"/> | <input type="checkbox"/> | <input type="checkbox"/> | <input type="checkbox"/> |
| This type of web application is boring                                | <input type="checkbox"/> | <input type="checkbox"/> | <input type="checkbox"/> | <input type="checkbox"/> | <input type="checkbox"/> |

**A14. Please rate the following questions from 1 (Strongly Disagree) to 5 (Strongly Agree).**

|                                                                                                 | Strongly<br>Disagree 1   |                          |                          |                          | Strongly<br>Agree 5      |
|-------------------------------------------------------------------------------------------------|--------------------------|--------------------------|--------------------------|--------------------------|--------------------------|
| This type of web application allows me to be more responsive and active in the learning process | <input type="checkbox"/> | <input type="checkbox"/> | <input type="checkbox"/> | <input type="checkbox"/> | <input type="checkbox"/> |
| This type of web application allows me to have more control over my own learning                | <input type="checkbox"/> | <input type="checkbox"/> | <input type="checkbox"/> | <input type="checkbox"/> | <input type="checkbox"/> |
| This type of web application promotes self-paced learning                                       | <input type="checkbox"/> | <input type="checkbox"/> | <input type="checkbox"/> | <input type="checkbox"/> | <input type="checkbox"/> |
| This type of web application helps to get myself engaged in the learning activity               | <input type="checkbox"/> | <input type="checkbox"/> | <input type="checkbox"/> | <input type="checkbox"/> | <input type="checkbox"/> |

**A15. Please rate the following questions from 1 (Strongly Disagree) to 5 (Strongly Agree).**

|                                                                             | Strongly<br>Disagree 1   | 2                        | 3                        | 4                        | Strongly<br>Agree 5      |
|-----------------------------------------------------------------------------|--------------------------|--------------------------|--------------------------|--------------------------|--------------------------|
| I was able to reflect on how I learn                                        | <input type="checkbox"/> | <input type="checkbox"/> | <input type="checkbox"/> | <input type="checkbox"/> | <input type="checkbox"/> |
| I was able to link new knowledge with my previous knowledge and experiences | <input type="checkbox"/> | <input type="checkbox"/> | <input type="checkbox"/> | <input type="checkbox"/> | <input type="checkbox"/> |
| I was able to become a better learner                                       | <input type="checkbox"/> | <input type="checkbox"/> | <input type="checkbox"/> | <input type="checkbox"/> | <input type="checkbox"/> |
| I was able to reflect on my own understanding                               | <input type="checkbox"/> | <input type="checkbox"/> | <input type="checkbox"/> | <input type="checkbox"/> | <input type="checkbox"/> |



**A16. Please rate the following questions from 1 (Strongly Disagree) to 5 (Strongly Agree).**

|                                                                         | Strongly Disagree 1      | 2                        | 3                        | 4                        | Strongly Agree 5         |
|-------------------------------------------------------------------------|--------------------------|--------------------------|--------------------------|--------------------------|--------------------------|
| I became more interested to learn about geologic mapping                | <input type="checkbox"/> | <input type="checkbox"/> | <input type="checkbox"/> | <input type="checkbox"/> | <input type="checkbox"/> |
| I learned a lot of factual information on geologic mapping              | <input type="checkbox"/> | <input type="checkbox"/> | <input type="checkbox"/> | <input type="checkbox"/> | <input type="checkbox"/> |
| I gained a good understanding of the basic concepts of geologic mapping | <input type="checkbox"/> | <input type="checkbox"/> | <input type="checkbox"/> | <input type="checkbox"/> | <input type="checkbox"/> |
| I learned to identify the main and important issues of geologic mapping | <input type="checkbox"/> | <input type="checkbox"/> | <input type="checkbox"/> | <input type="checkbox"/> | <input type="checkbox"/> |
| I was interested and stimulated to learn more                           | <input type="checkbox"/> | <input type="checkbox"/> | <input type="checkbox"/> | <input type="checkbox"/> | <input type="checkbox"/> |
| I was able to summarize and concluded what I learned                    | <input type="checkbox"/> | <input type="checkbox"/> | <input type="checkbox"/> | <input type="checkbox"/> | <input type="checkbox"/> |
| The learning activities were meaningful                                 | <input type="checkbox"/> | <input type="checkbox"/> | <input type="checkbox"/> | <input type="checkbox"/> | <input type="checkbox"/> |
| What I learned, I can apply in real context                             | <input type="checkbox"/> | <input type="checkbox"/> | <input type="checkbox"/> | <input type="checkbox"/> | <input type="checkbox"/> |

**A17. Please rate the following questions from 1 (Strongly Disagree) to 5 (Strongly Agree).**

|                                                                                                      | Strongly Disagree 1      | 2                        | 3                        | 4                        | Strongly Agree 5         |
|------------------------------------------------------------------------------------------------------|--------------------------|--------------------------|--------------------------|--------------------------|--------------------------|
| I was satisfied with this type of web-based learning experience                                      | <input type="checkbox"/> | <input type="checkbox"/> | <input type="checkbox"/> | <input type="checkbox"/> | <input type="checkbox"/> |
| A wide variety of learning materials was provided in this type of web-based learning environment     | <input type="checkbox"/> | <input type="checkbox"/> | <input type="checkbox"/> | <input type="checkbox"/> | <input type="checkbox"/> |
| I don't think this type of web-based experience would benefit my learning achievement                | <input type="checkbox"/> | <input type="checkbox"/> | <input type="checkbox"/> | <input type="checkbox"/> | <input type="checkbox"/> |
| I was satisfied with the immediate information gained in this type of web-based learning environment | <input type="checkbox"/> | <input type="checkbox"/> | <input type="checkbox"/> | <input type="checkbox"/> | <input type="checkbox"/> |
| I was satisfied with the teaching methods in this type of web-based learning environment             | <input type="checkbox"/> | <input type="checkbox"/> | <input type="checkbox"/> | <input type="checkbox"/> | <input type="checkbox"/> |
| I was satisfied with this type of web-based learning environment                                     | <input type="checkbox"/> | <input type="checkbox"/> | <input type="checkbox"/> | <input type="checkbox"/> | <input type="checkbox"/> |
| I was satisfied with the overall learning effectiveness                                              | <input type="checkbox"/> | <input type="checkbox"/> | <input type="checkbox"/> | <input type="checkbox"/> | <input type="checkbox"/> |

**A18. Please rate the following questions from 1 (Strongly Disagree) to 5 (Strongly Agree).**

|                                                                                           | Strongly Disagree 1      | 2                        | 3                        | 4                        | Strongly Agree 5         |
|-------------------------------------------------------------------------------------------|--------------------------|--------------------------|--------------------------|--------------------------|--------------------------|
| I am confident and can understand the basic concepts of Strike and Dip                    | <input type="checkbox"/> | <input type="checkbox"/> | <input type="checkbox"/> | <input type="checkbox"/> | <input type="checkbox"/> |
| I am confident that I understand the most complex concepts related to Strike and Dip      | <input type="checkbox"/> | <input type="checkbox"/> | <input type="checkbox"/> | <input type="checkbox"/> | <input type="checkbox"/> |
| I am confident that I can do an excellent job on the assignments and tests in this course | <input type="checkbox"/> | <input type="checkbox"/> | <input type="checkbox"/> | <input type="checkbox"/> | <input type="checkbox"/> |
| I expect to do well in this course                                                        | <input type="checkbox"/> | <input type="checkbox"/> | <input type="checkbox"/> | <input type="checkbox"/> | <input type="checkbox"/> |



|                                                                                                                                                                                                           | Strongly<br>Disagree 1   | 2                        | 3                        | 4                        | Strongly<br>Agree 5      |
|-----------------------------------------------------------------------------------------------------------------------------------------------------------------------------------------------------------|--------------------------|--------------------------|--------------------------|--------------------------|--------------------------|
| I am certain that I can master the skills being taught in this course                                                                                                                                     | <input type="checkbox"/> | <input type="checkbox"/> | <input type="checkbox"/> | <input type="checkbox"/> | <input type="checkbox"/> |
| <b>A19. How did your experience using the strike and dip tool change between the first and second mapping activities? Explain within the context of the technology (ease of use, functionality, etc.)</b> |                          |                          |                          |                          |                          |
| <div></div>                                                                                                                                                                                               |                          |                          |                          |                          |                          |
| <b>A20. How was your learning experience using this tool? Describe how you felt about practicing geologic mapping in a virtual environment.</b>                                                           |                          |                          |                          |                          |                          |
| <div></div>                                                                                                                                                                                               |                          |                          |                          |                          |                          |
| <b>Section B: End of the assignment</b>                                                                                                                                                                   |                          |                          |                          |                          |                          |
| Please press "SUBMIT" below. Have a good day!                                                                                                                                                             |                          |                          |                          |                          |                          |
| <b>B1. Thank you! This is the end of the experiment. We appreciate that you took the time to help us with our research. Would you like to participate in future studies?</b>                              |                          |                          |                          |                          |                          |
|                                                                                                                                                                                                           |                          |                          |                          | Yes                      | <input type="checkbox"/> |
|                                                                                                                                                                                                           |                          |                          |                          | No                       | <input type="checkbox"/> |
| <b>This is the end.</b>                                                                                                                                                                                   |                          |                          |                          |                          |                          |



722 **CODE/DATA AVAILABILITY**

723 The SaD tool is located at <https://sites.psu.edu/virtualfieldtrips/strike-and-dip/>. Additionally, a  
724 developer log is located at <https://sites.psu.edu/bartonmasters/sad-strike-and-dip-links/> and is  
725 maintained by Bart Masters.

726 **AUTHOR CONTRIBUTIONS**

727 NB, HR and AK conceived the experiment in collaboration with PS and BM who developed and  
728 programmed the SaD software. NB created the lab exercise. Analyses were conducted by PS, JH,  
729 JZ and JOW in collaboration with AK. Manuscript was written by NB, PS, HR, AK, and JH. HR  
730 created the figures. All authors discussed the results and manuscript narrative, and all contributed  
731 substantially to the editing process.

732 **COMPETING INTERESTS**

733 The authors declare that they have no conflict of interest.

734 **SPECIAL ISSUE STATEMENT**

735 This article is part of the special issue “Virtual geoscience education resources” in Geoscience  
736 Communication Letters.

737 **ACKNOWLEDGMENTS**

738 The authors would like to thank Dr. Peter La Femina of Penn State University and his teaching  
739 assistants for performing this lab in his Geosc 001 - Physical Geology laboratory. We would also  
740 like to thank Dr. Mahda Bagher for creating the survey used to gather the data used in this paper.  
741





## 742 REFERENCES

- 743 Alles, M., and Riggs, E. M.: Developing a process model for visual penetrative ability, in Feig,  
 744 A.D., and Stokes, A., (Eds.), *Qualitative Inquiry in Geoscience Education Research*,  
 745 Geological Society of America Special Paper 474, p. 63–80, 2011.
- 746 Almquist, H., Stanley, G., Blank, L., Hendrix, M., Rosenblatt, M., Hanfling, S., and Crews, J.: An  
 747 Integrated Field-Based Approach to Building Teachers' Geoscience Skills, *Journal of*  
 748 *Geoscience Education*, Vol. 59, No. 1, pp. 31–40, 2018.
- 749 Andrews, G. D., Labishak, G., Brown, S., Isom, S. L., Pettus, H. D., and Byers, T.: Teaching with  
 750 Digital 3D Models of Minerals and Rocks. *GSA Today*, Vol. 30, pp. 42–43, 2020.
- 751 Atit, K., Uttal, D. H., and Stieff, M., Situating space: using a discipline-focused lens to examine  
 752 spatial thinking skills, *Cognitive research: principles and implications*, Vol. 5, No. 1, p. 19,  
 753 2020.
- 754 Bagher, M., Sajjadi, P., Wallgrün, J.O., La Femina, P.C., Klippel, A., under review. Move The  
 755 Object or Move The User: The Role of Interaction Techniques on Embodied Learning in  
 756 VR. *Frontiers in Virtual Reality*, 2021.
- 757 Bangera, G., and Brownell, S. E.: Course-based undergraduate research experiences can make  
 758 scientific research more inclusive, *CBE Life Sciences Education*, Vol. 13, No. 4, pp. 602–  
 759 606, 2014.
- 760 Barab, S. and Dede, C.: Games and Immersive Participatory Simulations for Science Education:  
 761 An Emerging Type of Curricula, *Journal of Science Education and Technology*, Vol. 16,  
 762 No. 1, pp. 1–3, 2007.
- 763 Bethune, K.: Changing Trends and Rethinking Geoscience Education in the Context of a Global  
 764 Crisis. *Geoscience Canada*, Vol. 47, No. 4, pp. 167–169,  
 765 <https://doi.org/10.12789/geocanj.2020.47.164>, 2020.
- 766 Bowman, D. A., North, C., Chen, J., Polys, N. F., Pyla, P. S., and Yilmaz, U.: Information-rich  
 767 virtual environments, *Proceedings of the ACM Symposium on Virtual Reality Software*  
 768 *and Technology*, ACM, New York, NY, p. 81., 2003.
- 769 Bowman, D. A. and McMahan, R. P.: Virtual reality: How much immersion is enough?, *Computer*,  
 770 Vol. 40, No. 7, pp. 36–43, 2007.



- 771 Bursztyn, N., Shelton, B., Walker, A., and Pederson, J.: Increasing Undergraduate Interest to Learn  
 772 Geoscience with GPS-based Augmented Reality Field Trips on Students' Own  
 773 Smartphones, *GSA Today*, pp. 4–10, 2017.
- 774 Bursztyn, N., Riegel, H., Sajjadi, P., Masters, B., Zhao, J., Huang, J., Bagher, M., Wallgrun, J.,  
 775 and Klippel, A. Fostering Geological Thinking Through Virtual Strike and Dip  
 776 Measurements. 2021 IEEE Conference on Virtual Reality and 3D User Interfaces Abstracts  
 777 and Workshops (VRW), pp. 303-308, doi: 10.1109/VRW52623.2021.00061, 2021.
- 778 Cawood, A. J., and Bond, C. E.: eRock: An Open-Access Repository of Virtual Outcrops for  
 779 Geoscience Education, *GSA Today*, <https://doi.org/10.1130/GSATG373GW.1>, 2018.
- 780 Chenrai, P., and Jitmahantakul, S.: Applying Virtual Reality Technology to Geoscience  
 781 Classrooms, *Review of International Geographical Education Online*, Vol. 9, No. 3, pp  
 782 577-590, 2019.
- 783 Cunningham, T.D., and Lansiquot, R.D.: Modeling Interdisciplinary Place-Based Learning in  
 784 Virtual Worlds: Lessons Learned and Suggestions for the Future", in Lansiquot, R.D., and  
 785 MacDonald S.P. (Eds.), *Interdisciplinary Perspectives on Virtual Place-Based Learning*,  
 786 Springer International Publishing, Cham, pp. 133–145, 2019.
- 787 Dalgarno, B.: The potential of 3D virtual learning environments: A constructivist analysis.  
 788 *Electronic Journal of Instructional Science and Technology*, Vol. 5, No. 2, pp. 3-6, 2002.
- 789 Dede, C.: Immersive interfaces for engagement and learning, *Science*, Vol. 323, No. 5910, pp. 66–  
 790 69, 2009.
- 791 Dolphin, G., Dutchak, A., Karchewski, B., and Cooper, J.: Virtual field experiences in introductory  
 792 geology: Addressing a capacity problem, but finding a pedagogical one, *Journal of*  
 793 *Geoscience Education*, Vol. 67, No. 2, pp. 114–130, 2019.
- 794 Earth Educators Rendezvous workshop, The whys and hows of implementing virtual and  
 795 augmented reality in Earth Science Classrooms, conveners: Moysey, S., Maas, B., Lazar,  
 796 K., Klippel, A., and Bursztyn, N., July 13-17, 2020.
- 797 Elkins, J., and Elkins, N. M. L.: Teaching geology in the field: Significant geoscience concept  
 798 gains in entirely field-based introductory geology courses, *Journal of Geoscience*  
 799 *Education*, Vol. 55, No. 2, 2017.



- 800 Gagnier, K. M., Atit, K., Ormand, C. J., Shipley, T. F.: Comprehending 3D Diagrams: Sketching  
 801 to Support Spatial Reasoning, *Topics in Cognitive Science*, Vol. 9, No. 4, pp. 883–901,  
 802 2017.
- 803 Giles, S., Jackson, C., and Stephen, N.: Barriers to fieldwork in undergraduate geoscience degrees,  
 804 *Nature Reviews Earth & Environment*, Vol. 1, No. 2, pp. 77–78, 2020.
- 805 Hall, T., Healey, M., and Harrison, M.: Fieldwork and disabled students: Discourses of exclusion  
 806 and inclusion, *Journal of Geography in Higher Education*, Vol. 28, No. 2, pp. 255–280,  
 807 2004.
- 808 Hocine, N., Gouaich, A., and Cerri, S.A.: Dynamic Difficulty Adaptation in Serious Games for  
 809 Motor Rehabilitation, *International Conference on Serious Games*, pp. 115–128, 2015.
- 810 Höffler, T.N., and Leutner, D.: The role of spatial ability in learning from instructional animations  
 811 - Evidence for an ability-as-compensator hypothesis, *Computers in Human Behavior*, Vol.  
 812 27, No. 1, pp. 209–216, 2011.
- 813 IJsselsteijn, W.A., and Riva, G.: Being there: The experience of presence in mediated  
 814 environments, in IJsselsteijn, W.A., Riva, G., and Davide, F., (Eds.), *Being there:*  
 815 *Concepts, effects and measurements of user presence in synthetic environments*, IOS,  
 816 Amsterdam, Oxford, pp. 3–16, 2003.
- 817 Jamieson, M., Cullen, B., McGee-Lennon, M., Brewster, S., and Evans, J. J.: The efficacy of  
 818 cognitive prosthetic technology for people with memory impairments: a systematic review  
 819 and meta-analysis, *Neuropsychological rehabilitation*, Vol. 24, No. 3-4, pp. 419–444,  
 820 2014.
- 821 Johnson-Glenberg, Mina C.: Immersive VR and Education. Embodied design principles that  
 822 include gesture and hand controls. In *Front. Robot. AI* 5, p. 27. DOI:  
 823 10.3389/frobt.2018.00081, 2018.
- 824 Klingenberg, S., Jørgensen, M. L., Dandanell, G., Skriver, K., Mottelson, A., and Makransky, G.:  
 825 Investigating the effect of teaching as a generative learning strategy when learning through  
 826 desktop and immersive VR: A media and methods experiment. *British Journal of*  
 827 *Educational Technology*, Vol. 51, No. 6, pp. 2115-2138, 2020.
- 828 Klippel, A., Zhao, J., Jackson, K. L., La Femina, P., Stubbs, C., and Oprean, D.: Transforming  
 829 earth science education through immersive experiences - delivering on a long held promise.



- 830 In Journal of Educational Computing Research, Vol. 57, No. 7, pp. 1745–1771. DOI:  
 831 10.1177/0735633119854025, 2019.
- 832 Klippel, A., Zhao, J., Oprean, D., Wallgrün, J. O., Stubbs, C., La Femina, P., and Jackson, K. L.:  
 833 The value of being there: toward a science of immersive virtual field trips. In Virtual  
 834 Reality 24, pp. 753–770. DOI: 10.1007/s10055-019-00418-5, 2020.
- 835 Klippel, A., Zhao, J., Sajjadi, P., Wallgrün, J. O., Bagher, M. M., and Oprean, D.: Immersive place-  
 836 based learning – An extended research framework. In : 2020 IEEE Conference on Virtual  
 837 Reality and 3D User Interfaces Abstracts and Workshops (VRW). Piscataway, NJ: IEEE,  
 838 pp. 449–454. Available online at [https://conferences.computer.org/vr-](https://conferences.computer.org/vr-tvcg/2020/pdfs/VRW2020-4a2sylvMzvvhioY0A33wsS/653200a449/653200a449.pdf)  
 839 [tvcg/2020/pdfs/VRW2020-4a2sylvMzvvhioY0A33wsS/653200a449/653200a449.pdf](https://conferences.computer.org/vr-tvcg/2020/pdfs/VRW2020-4a2sylvMzvvhioY0A33wsS/653200a449/653200a449.pdf),  
 840 2020.
- 841 Kolb, David A.: Experiential learning. Experience as the source of learning and development.  
 842 Second edition. Upper Saddle River, New Jersey: Pearson Education Inc., 2014.
- 843 Lages, W. S. and Bowman, D. A.: Move the Object or Move Myself?: Walking vs. Manipulation  
 844 for the Examination of 3D Scientific Data, Frontiers in ICT, Vol. 5, p. 236., 2018.
- 845 Lansiquot, R. D. and MacDonald S. P. (Eds.): Interdisciplinary Perspectives on Virtual Place-  
 846 Based Learning, Springer International Publishing, Cham., 2019.
- 847 Lee, E.A.-L., Wong, K. W., and Fung, C. C.: Educational values of virtual reality: The case of  
 848 spatial ability, Proceedings of World Academy of Science, Engineering and Technology.  
 849 Paris, France, 2009.
- 850 Liu, R., Wang, L., Lei, J., Wang, Q., and Ren, Y.: Effects of an immersive virtual reality-based  
 851 classroom on students’ learning performance in science lessons, British Journal of  
 852 Educational Technology, 2020.
- 853 Lopes, R., and Bidarra, R.: Adaptivity challenges in games and simulations: A survey, IEEE  
 854 Transactions on Computational Intelligence and AI in Games, Vol. 3, No. 2, pp. 85–99,  
 855 2011.
- 856 Maceachren, A.M., and Brewer, I.: Developing a conceptual framework for visually-enabled  
 857 geocollaboration, Int. J. Geographical Information Science, Vol. 18, No. 1, pp. 1-34, DOI:  
 858 10.1080/13658810310001596094, 2004.



- 859 Marín-Spiotta, E., Barnes, R. T., Berhe, A. A., Hastings, M. G., Mattheis, A., Schneider, B., and  
 860 Williams, B. M.: Hostile climates are barriers to diversifying the geosciences. In *Adv.*  
 861 *Geosci.* 53, pp. 117–127. DOI: 10.5194/adgeo-53-117-2020, 2020.
- 862 Marshall, M. S. and Higley, M. C.: Multi-scale virtual field experience, Grand Ledge, Michigan,  
 863 USA, *Geosci. Commun. Discuss.* [preprint], <https://doi.org/10.5194/gc-2021-10>, in  
 864 review, 2021.
- 865 Mayer, R. E. and Sims, V. K.: For whom is a picture worth a thousand words? Extensions of a  
 866 dual-coding theory of multimedia learning, *Journal of Educational Psychology*, Vol. 86,  
 867 No. 3, pp. 389–401, 1994.
- 868 McComas W.F. (Ed.): *The Language of Science Education: An Expanded Glossary of Key Terms*  
 869 *and Concepts in Science Teaching and Learning*, SensePublishers and Imprint:  
 870 SensePublishers, Rotterda, 2014.
- 871 Mead, C., Buxner, S., Bruce, G., Taylor, W., Semken, S., and Anbar, A.D.: Immersive, interactive  
 872 virtual field trips promote science learning, *Journal of Geoscience Education*, Vol. 67, No.  
 873 2, pp. 131–142. DOI: 10.1080/10899995.2019.1565285, 2019.
- 874 Morales, N., O’Connell, K. B., McNulty, S., Berkowitz, A., Bowser, G., Giamellaro, M., and  
 875 Miriti, M. N.: Promoting inclusion in ecological field experiences: Examining and  
 876 overcoming barriers to a professional rite of passage, *The Bulletin of the Ecological*  
 877 *Society of America*, Vol. 101, No. 4, p. 11., 2020.
- 878 Moysey, S. M. J., and Lazar, K. B.: Using virtual reality as a tool for field-based learning in the  
 879 earth sciences, in Lansiquot, R.D., and MacDonald, S.P. (Eds.), *Interdisciplinary*  
 880 *Perspectives on Virtual Place-Based Learning*, Springer International Publishing, Cham.,  
 881 2019.
- 882 Newcombe, N. S.: *Picture This: Increasing math and science learning by improving spatial*  
 883 *thinking*, American Educator, 2010.
- 884 O’Connor, E.A. and Domingo, J.: A Practical Guide, With Theoretical Underpinnings, for  
 885 Creating Effective Virtual Reality Learning Environments, *Journal of Educational*  
 886 *Technology Systems*, Vol. 45, No. 3, pp. 343–364, 2017.
- 887 Orion, N., and Hofstein, A.: Factors that influence learning during a scientific field trip in a natural  
 888 environment, *Journal of Research in Science Teaching*, Vol. 31, No. 10, pp. 1097–1119,  
 889 2014.



- 890 Ormand, C. J., Shipley, T. F., Tikoff, B., Harwood, C. L., Atit, K., and Boone, A. P.: Evaluating  
 891 Geoscience Students' Spatial Thinking Skills in a Multi-Institutional Classroom Study,  
 892 Journal of Geoscience Education, Vol. 62, No. 1, pp. 146–154, 2014.
- 893 O’Sullivan, M., and Kearney, G.: Virtual Reality (VR) Technology: Empowering Managers to  
 894 Reduce and Eliminate Accessibility Barriers for People with Autism Spectrum Disorders,  
 895 Studies in Health Technology and Informatics, Vol. 256, pp. 253–261, 2018.
- 896 Parong, J., and Mayer, R. E.: Cognitive and affective processes for learning science in immersive  
 897 virtual reality, Journal of Computer Assisted Learning, 2020.
- 898 Peirce, N., and Wade, V.: Personalised learning for casual games: The ‘language trap’ online  
 899 language learning game, Leading Issues in Games Based Learning, Vol. 159, 2019.
- 900 Petersen, G. B., Klingenberg, S., Mayer, R. E., and Makransky, G.: The virtual field trip:  
 901 Investigating how to optimize immersive virtual learning in climate change education. In  
 902 Br J Educ Technol. DOI: 10.1111/bjet.12991, 2020.
- 903 Powers, A. L.: An evaluation of four place-based education programs, The Journal of  
 904 Environmental Education, Vol. 35, No. 4, pp. 17–32, 2004.
- 905 President’s Council of Advisors on Science and Technology (PCAST): Engage to Excel:  
 906 Producing One Million Additional College Graduates with Degrees in Science,  
 907 Technology, Engineering and Mathematics, U.S. Government Office of Science and  
 908 Technology, Washington, DC, 2012.
- 909 Pyle, E. J.: The evaluation of field course experiences: A framework for development,  
 910 improvement, and reporting, in Whitmeyer, S.J., Mogk, D.W., and Pyle, E.J. (Eds.), Field  
 911 Geology Education: Historical perspectives and modern approaches: GSA Special Paper  
 912 461, Geological Society of America, Boulder, CO, pp. 341–356, 2009.
- 913 Rotzien, J. R., Sincavage, R., Pellowski, C., Gavillot, Y., Cooper, S., Shannon, J., Sawyer, J.F.,  
 914 Yildiz, U., Filkorn, H., and Uzunlar, N.: Field-based geoscience education during the  
 915 COVID-19 pandemic: Planning and execution, Part II: Geological Society of America,  
 916 GSA 2020 Connects Online, abstract no. 359659. [https://doi.org/10.1130/abs/2020AM-](https://doi.org/10.1130/abs/2020AM-359659)  
 917 359659., 2020.
- 918 Rotzein, J. R., Sincavage, R., Pellowski, C., Gavillot, Y., Filkorn, Cooper, S., Shannon, J., Yildiz,  
 919 U., Sawyer, F., and Uzunlar, N.: Field-Based Geoscience Education during the COVID-19



- 920 Pandemic: Planning, Execution, Outcomes, and Forecasts, *GSA Today*, v. 31, pp. 4-10,  
 921 [doi.org/10.1130/GSATG483A.1](https://doi.org/10.1130/GSATG483A.1). CC-BY-NC, 2021.
- 922 Sajjadi, P., van Broeckhoven, F., and de Troyer, O.: Dynamically adaptive educational games: A  
 923 new perspective", *International Conference on Serious Games*, pp. 71–76, 2014
- 924 Sajjadi, P., Zhao, J., Wallgrün, J. O., Fatemi, A., Zidik, Z., La Femina, P., Fuhrman, T., and  
 925 Klippel, A.: The effect of virtual agent gender and embodiment on the experiences and  
 926 performance of students in Virtual Field Trips. In : 2020 IEEE International Conference on  
 927 Engineering, Technology and Education. Piscataway, New Jersey: IEEE, pp. 1–8, 2020.
- 928 Schreier, M.: *Qualitative content analysis in practice*. Sage Publications, 2012.
- 929 Semken, S., Ward, E.G., Moosavi, S., and Chinn, P.W.U., 2018. Place-based education in  
 930 geoscience: Theory, research, practice, and assessment: Theory, Research, Practice, and  
 931 Assessment, *Journal of Geoscience Education*, Vol. 65, No. 4, pp. 542–562.
- 932 Shipley, T. F., Tikoff, B., Ormand, C., and Manduca, C.: Structural geology practice and learning,  
 933 from the perspective of cognitive science, *Journal of Structural Geology*, Vol. 54, pp. 72–  
 934 84, 2013.
- 935 Shute, V.J., Wang, L., Greiff, S., Zhao, W., and Moore, G.: Measuring problem solving skills via  
 936 stealth assessment in an engaging video game, *Computers in Human Behavior*, Vol. 63,  
 937 pp. 106–117, 2016.
- 938 Simpson, M., Zhao, J., and Klippel, A.: Take a walk: Evaluating movement types for data  
 939 visualization in immersive virtual reality, *Workshop on Immersive Analytics (IA)*, at IEEE  
 940 VIS, Phoenix, Arizona, USA, October 1<sup>st</sup>, 2017.
- 941 Simpson, M.: *Scale and Space: Representations in Immersive Virtual Reality*, Ph.D., University  
 942 Park, PA USA, 2020.
- 943 Slater, M.: Measuring Presence: A Response to the Witmer and Singer Presence Questionnaire,  
 944 *Presence: Teleoperators and Virtual Environments*, Vol. 8, No. 5, pp. 560–565, 1999.
- 945 Streicher, A., and Smeddinck, J. D.: Personalized and Adaptive Serious Games, *Entertainment  
 946 Computing and Serious Games*, pp. 332–377., 2016.
- 947 Stumpf II, R. J., Douglass, J., and Dorn, R. I.: Learning Desert Geomorphology Virtually versus  
 948 in the Field, *Journal of Geography in Higher Education*, Vol. 32, No.3, pp. 387-399, DOI:  
 949 [10.1080/03098260802221140](https://doi.org/10.1080/03098260802221140), 2008.



- 950 Tibaldi, A., Bonali, F. L., Vitello, F., Delage, E., Nomikou, P., Antoniou, V. E., Becciani, U., Van  
 951 Wyk de Vreis, B., Krokos, M., and Whitworth, M.: Real world-based immersive Virtual  
 952 Reality for research, teaching and communication in volcanology. *Bull Volcanol.* Vol. 82,  
 953 No. 38, <https://doi.org/10.1007/s00445-020-01376-6>, 2020.
- 954 Titus, S., and Horsman, E.: Characterizing and Improving Spatial Visualization Skills", *Journal of*  
 955 *Geoscience Education*, Vol. 57, No. 4, pp. 242–254, 2009.
- 956 Uttal, D.H. and Cohen, C.A.: Spatial Thinking and STEM Education, Vol. 57, pp. 147–181, 2012.
- 957 Vandewaetere, M., Cornillie, F., Clarebout, G., and Desmet, P.: Adaptivity in Educational Games:  
 958 Including Player and Gameplay Characteristics, *International Journal of Higher Education*,  
 959 Vol. 2, No. 2, 2013.
- 960 Whitmeyer, S.J. and Dordevic, M.: Creating virtual geologic mapping exercises in a changing  
 961 world. *Geosphere* 2020; Vol. 17, No.1, pp. 226–243, <https://doi.org/10.1130/GES02308.1>,  
 962 2021.
- 963 Winn, W.: A conceptual basis for educational applications of virtual reality. Technical Publication  
 964 R-93-9, Human Interface Technology Laboratory of the Washington Technology Center,  
 965 Seattle: University of Washington, 1993.
- 966 Witmer, B.G. and Singer, M.J.: Measuring presence in virtual environments: A presence  
 967 questionnaire, *Presence*, Vol. 7, No. 3, pp. 225–240, 1998.
- 968 Wu, B., Yu, X., and Gu, X.: Effectiveness of immersive virtual reality using head-mounted  
 969 displays on learning performance: A meta-analysis, *British Journal of Educational*  
 970 *Technology*, Vo. 51, Iss. 6, pp. 1991-2005, <https://doi.org/10.1111/bjet.13023>, 2020.
- 971 Zaharias, P., Mehlenbacher, B., Law, E.L.-C., and Sun, X.: Evaluating user experience of adaptive  
 972 digital educational games with Activity Theory, *International Journal of Human-Computer*  
 973 *Studies*, Vol. 70, No. 7, pp. 478–497, 2012.
- 974 Zhao, J., and Klippel, A.: Scale-unexplored opportunities for immersive technologies in place-  
 975 based learning, 2019 IEEE Conference on Virtual Reality and 3D User Interfaces (VR),  
 976 pp. 155–162, 2019.
- 977 Zhao, J., Simpson, M., Wallgrün, J.O., Sajjadi, P., and Klippel, A.: Exploring the Effects of  
 978 Geographic Scale on Spatial Learning, *Cognitive research: principles and implications*,  
 979 Vol. 5, No. 1, p. 14, 2020.
